1 **Short title**

2 Molecular mechanism of photoperiod sensing

3 **Corresponding Author**

4 Muhammad Usman Anwer, Institute of Agricultural and Nutritional Sciences, Martin Luther University  
5 Halle-Wittenberg, Betty-Heimann-Str. 5, 06120 Halle (Saale), Germany.

6 **Article Title**

7 **Photoperiod sensing of the circadian clock is controlled by ELF3 and GI**

8 Muhammad Usman Anwer<sup>1,2\*</sup>, Amanda Davis<sup>3</sup>, Seth Jon Davis<sup>3</sup> and Marcel Quint<sup>1,2</sup>

9 1- Institute of Agricultural and Nutritional Sciences, Martin Luther University Halle-Wittenberg, Betty-  
10 Heimann-Str. 5, 06120 Halle (Saale), Germany

11 2- Department of Molecular Signal Processing, Leibniz Institute of Plant Biochemistry, Weinberg 3,  
12 06120 Halle (Saale), Germany

13 3- University of York, Department of Biology, Heslington, York, YO10 5DD, United Kingdom.

14 **One sentence summary**

15 ELF3 and GI are essential for circadian clock mediated photoperiod sensing.

16 **Author Contributions**

17 M.U.A., S.J.D. and M.Q. conceived the project. M.U.A. and A.D. performed the experiments. M.U.A.  
18 wrote the article with contributions of all authors.

19 **Funding information**

20 The funding for this work was provided by a Biotechnology and Biological Sciences Research Council  
21 grant to SJD (BBSRC grant code BB/N018540/1), a grant by the Deutsche Forschungsgemeinschaft to MQ  
22 (Qu 141/6-1), and the Leibniz Association.

23 \* **Correspondence:** [muhammad.anwer@landw.uni-halle.de](mailto:muhammad.anwer@landw.uni-halle.de)

24 **Abstract**

25 *ELF3* and *GI* are two important components of the Arabidopsis circadian clock. They are not only  
26 essential for the oscillator function but are also pivotal in mediating light inputs to the oscillator. Lack of  
27 either results in a defective oscillator causing severely compromised output pathways, such as  
28 photoperiodic flowering and hypocotyl elongation. Although single loss of function mutants of *ELF3* and  
29 *GI* have been well-studied, their genetic interaction remains unclear. We generated an *elf3 gi* double  
30 mutant to study their genetic relationship in clock-controlled growth and phase transition phenotypes.  
31 We found that *ELF3* and *GI* repress growth during the night and the day, respectively. We also provide  
32 evidence that *ELF3*, for which so far only a growth inhibitory role has been reported, can also act as a  
33 growth promoter under certain conditions. Finally, circadian clock assays revealed that *ELF3* and *GI* are  
34 essential *Zeitnehmers* that enable the oscillator to synchronize the endogenous cellular mechanisms to  
35 external environmental signals. In their absence, the circadian oscillator fails to synchronize to the light-  
36 dark cycles even under diurnal conditions. Consequently, clock-mediated photoperiod-responsive  
37 growth and development is completely lost in plants lacking both genes, suggesting that *ELF3* and *GI*  
38 together convey photoperiod sensing to the central oscillator. Since *ELF3* and *GI* are conserved across  
39 flowering plants and represent important breeding and domestication targets, our data highlight the  
40 possibility of developing photoperiod-insensitive crops by manipulating the combination of these two  
41 key genes.

## 42 **Introduction:**

43 Rotation of the earth around its axis results in rhythmic oscillations in light and temperature during a 24-  
44 hour day/night cycle. As a consequence of evolving under these predictable changes, organisms have  
45 developed internal timekeeping mechanisms known as the circadian clock that enables them to  
46 anticipate periodic changes in their surrounding environment (de Montaigne et al., 2010; Anwer and  
47 Davis, 2013). Circadian clocks consist of three pathways: inputs, core oscillators, and outputs. Input  
48 pathways deliver external cues (also known as *Zeitgeber*, German for time-givers), such as ambient light  
49 and temperature, to circadian oscillators. The timing information from the *Zeitgeber* is received by core-  
50 oscillator components known as *Zeitnehmer* (German for time-takers) that help to reset and synchronize  
51 the clock with the local environment (entrainment). Once entrained, the oscillators generate a ~24h  
52 rhythmicity that can be sustained for long periods; even in the absence of environmental cues (i.e., free-  
53 running conditions, such as constant light and temperature conditions) (Inoue et al., 2017; Oakenfull and  
54 Davis, 2017). After synchronizing with the external environment, oscillators link to various processes to  
55 rhythmically regulate the levels of genes, proteins, and metabolites. This allows organisms to anticipate  
56 and adapt to the changing environment, such as seasonal changes in day length (photoperiod). The  
57 circadian clock thereby regulates various output pathways including photosynthesis, growth, disease  
58 resistance, starch metabolism, and flowering time (Andres and Coupland, 2012; Shin et al., 2013; Müller  
59 et al., 2014).

60 The central part of the clock, the oscillators, are composed of transcriptional-translational feedback  
61 loops (Nohales and Kay, 2016; Ronald and Davis, 2017). The *Arabidopsis thaliana* (*Arabidopsis*) oscillator  
62 consists of three such loops: a morning loop, an evening loop and a central oscillator. The central  
63 oscillator is comprised of two partially redundant myb-like transcription factors CIRCADIAN CLOCK  
64 ASSOCIATED 1 (CCA1) and LATE ELONGATED HYPOCOTYL (LHY), and a member of the PSEUDO-  
65 RESPONSE REGULATOR (PRR) family TIMING OF CAB EXPRESSION 1 (TOC1/PRR1). This is a dual negative  
66 feedback loop where respective morning and evening expression of *CCA1/LHY* and *TOC1* repress each  
67 other (Wang and Tobin, 1998; Alabadí et al., 2001; Huang et al., 2012). In the morning, the core-  
68 oscillator components *CCA1/LHY* activate *PRR7* and *PRR9*, which later repress *CCA1/LHY*, together  
69 constituting the morning loop (Zeilinger et al., 2006; Nakamichi et al., 2010; Kamioka et al., 2016). The  
70 evening expression of *TOC1* represses *GIGANTEA (GI)*, which in turn activates *TOC1* and formulates the  
71 evening loop (Locke et al., 2006; Kim et al., 2007; Huang et al., 2012). Besides these three fundamental  
72 loops, a complex of three evening phased proteins (known as evening complex or EC), consisting of  
73 EARLY FLOWERING 4 (ELF4), ELF3 and LUX ARRHYTHMO (LUX), have been identified as an essential part of  
74 the core oscillator (Nusinow et al., 2011; Herrero et al., 2012; Huang and Nusinow, 2016). The EC is  
75 connected to all three loops of the oscillator. By direct binding to their promoters, the EC represses the  
76 transcription of *PRR9* and *GI* (Helfer et al., 2011; Herrero et al., 2012; Mizuno et al., 2014; Ezer et al.,  
77 2017). A direct repression of *ELF3* by *CCA1* connects the EC with the central oscillator (Lu et al., 2012;  
78 Kamioka et al., 2016).

79 ELF3 is one focus of this study and it encodes a multifunctional protein that regulates several  
80 physiological and developmental processes. Consistently, *elf3* null mutants display pleiotropic  
81 phenotypes such as long hypocotyl, accelerated flowering, elongated petioles, and arrhythmia under  
82 free-running conditions, suggesting that several important pathways are disrupted (Hicks et al., 2001;  
83 Kolmos et al., 2011; Herrero et al., 2012; Anwer et al., 2014; Box et al., 2014). In addition to its role as a  
84 member of the EC in the core oscillator, it functions as a *Zeitnehmer* in the light input pathway.

85 Therefore, plants lacking *ELF3* display severe light gating defects (McWatters et al., 2000). A physical  
86 interaction of *ELF3* and PHYTOCHROME B (PhyB) establishes a direct link between the oscillator and  
87 photoreceptors (Liu et al., 2001; Kolmos et al., 2011). For the regulation of rhythmic growth, *ELF3* mainly  
88 relies on the EC binding to the promoters of major growth regulators *PHYTOCHROME-INTERACTING*  
89 *FACTOR 4 (PIF4)* and *PIF5*, causing their transcriptional repression during the night (Nusinow et al., 2011;  
90 Raschke et al., 2015). However, *ELF3* can also inhibit *PIF4* by sequestering it from its targets (Nieto et al.,  
91 2014). Consistently, the lack of *PIF4/PIF5* repression in *elf3* mutants results in accelerated growth during  
92 the night (Nozue et al., 2007; Box et al., 2014). In addition to growth, *ELF3* controls flowering time by  
93 acting on the major floral activator FLOWERING LOCUS T (*FT*) via direct repression of *G1* (Mizuno et al.,  
94 2014; Ezer et al., 2017). Interestingly, *ELF3* repression of *FT* does not require *CONSTANS (CO)* (Kim et al.,  
95 2005). Taken together, functional presence of *ELF3* is essential for both plant growth and development.

96 The second protein in the focus of this study is *G1*, a large, preferentially nuclear-localized protein with  
97 domains of unknown functions (Panigrahi and Mishra, 2015). The gene's transcription is controlled by  
98 the circadian clock. Furthermore, it is post-transcriptionally regulated by light and dark (Fowler et al.,  
99 1999; David et al., 2006). *G1* regulates diverse developmental and physiological pathways. The role of *G1*  
100 in the control of photoperiodic flowering is well documented. Here, *G1* acts as a major activator of *FT*  
101 expression, either by directly binding to its promoter or by inducing the expression of *CO* (Fornara et al.,  
102 2009; Sawa and Kay, 2011). Moreover, *G1* physically interacts with both red and blue light  
103 photoreceptors PhyB and ZEITLUPE (*ZTL*), respectively, indicating a functional role also in  
104 photomorphogenesis (Kim et al., 2007; Yeom et al., 2014). Consistently, *g1* mutants are defective in  
105 proper light responses and display elongated hypocotyls under both red and blue lights (Huq et al.,  
106 2000; Martin-Tryon et al., 2007). Although the underlying molecular mechanism of hypocotyl growth  
107 regulation is not fully understood, it relies at least partially on *PIF4*, since the growth promoting effect of  
108 *g1* mutations was fully masked by the absence of *PIF4* (de Montaigu et al., 2014; Fornara et al., 2015).  
109 The EC subunit *ELF4* is epistatic to *G1* in regulating hypocotyl length, suggesting that the *G1* effect on *PIF4*  
110 is EC dependent (Kim et al., 2012). However, *ELF4* masking of *G1* is specific to growth regulation because  
111 in flowering time control the genetic hierarchy between these two is reversed. Here, *G1* is epistatic to  
112 *ELF4*. To make the interaction between these two players even more interesting, both are working  
113 additively or synergistically in the control of the circadian clock (Kim et al., 2012). *G1* plays a pivotal role  
114 in generating robust circadian rhythms under natural conditions in a way that daily rhythms of its  
115 expression respond to day length that depends on the latitude of origin of *Arabidopsis* accessions (de  
116 Montaigu and Coupland, 2017).

117 Interestingly, *G1* co-localizes with the EC components *ELF4*, *ELF3* and *LUX* in nuclear bodies (Yu et al.,  
118 2008; Herrero et al., 2012), where it physically interacts with *ELF4* and *ELF3* (Yu et al., 2008; Kim et al.,  
119 2013). *ELF4* regulates *G1* subcellular localization and modulates its DNA binding ability by sequestering it  
120 from the nucleosome (Kim et al., 2013). Further, *G1* and *ELF4* have differentially dominant influences on  
121 circadian physiological outputs at dusk and dawn, respectively (Kim et al., 2012). The functional  
122 importance of *ELF3-G1* interaction is unknown. However, it is reported that *ELF3* regulates diurnal  
123 protein accumulation of *G1* by facilitating its degradation during darkness by a CONSTITUTIVE  
124 PHOTOMORPHOGENIC 1 (*COP1*) mediated proteasomal mechanism (Yu et al., 2008). Consistent with the  
125 finding that *ELF3* binds to the *G1* promoter and represses its transcription (Mizuno et al., 2014), all  
126 components of the EC were found to bind the *G1* promoter in a CHIP-Seq experiment, demonstrating a  
127 direct relationship between *G1* and the EC (Ezer et al., 2017).

128 As mentioned above, the genetic hierarchy between *ELF4* and *GI* is relatively well understood (Kim et al.,  
129 2012). Based on the observations that mutations in EC components exhibit similar defects (Herrero et  
130 al., 2012), a conserved genetic relationship between *GI* and other EC components seems reasonable. On  
131 the other hand, the finding that *ELF3* likely functions also independently of the EC (Nieto et al., 2014)  
132 opens the possibility for a different pattern of genetic interactions between *ELF3* and *GI*.

133 In this study, we provide genetic support for the biochemical evidence of an EC independent function of  
134 *ELF3*. We furthermore demonstrate that *ELF3* and *GI* are essential clock *Zeitnehmers* that are required to  
135 synchronize endogenous signals with the external environment. In their absence the circadian clock fails  
136 to respond to light signals, resulting in the breakdown of the photoperiod sensing mechanism. From an  
137 applied perspective, this interaction has the potential to generate photoperiod-independent crops,  
138 possibly allowing the cultivation of numerous day light sensitive species in currently non-permissive  
139 latitudes.

140 **Results:**

141 ***ELF3* and *GI* are essential for photoperiod responsive growth and development**

142 *ELF3* and *GI* are two important factors involved in photoperiod responsive flowering (Andres and  
143 Coupland, 2012; Lu et al., 2012). A previous report has suggested that under long days (LD, 16h light/8 h  
144 dark) *GI* is epistatic to *ELF3* (Chou and Yang, 1999). *GI* is also epistatic to *ELF4*, another component of EC,  
145 further suggesting that flowering time control of the EC acts through *GI* (Kim et al., 2012). However, it is  
146 unclear whether the suggested genetic hierarchy between *ELF3* and *GI* is universally applicable under a  
147 range of photoperiods. To investigate the environmental sensitivity of these genetic interactions in  
148 detail, we generated an *elf3-4 gi-158* double mutant (hereafter designated as *elf3 gi*) and measured  
149 flowering time in comparison to the corresponding single mutants *elf3-4* (hereafter designated as *elf3*)  
150 and *gi-158* (hereafter designated as *gi*), and the *Ws-2* wild type (WT) under long day (LD, 16h light/8 h  
151 dark), short day (SD, 8/16), and neutral day (ND, 12/12) photoperiods. Consistent with reported  
152 phenotypes of *elf3* and *gi* null mutants (Zagotta et al., 1996; Fowler et al., 1999; Lu et al., 2012), *gi* and  
153 *elf3* flowered later and earlier, respectively, than WT under all photoperiods tested (Figure 1A).  
154 Furthermore, similarly to WT, both single mutant alleles flowered earlier in longer photoperiods than in  
155 shorter photoperiods, therefore displaying an intact response to the length of the light period.  
156 Interestingly, such a photoperiodic response was completely lost in the *elf3 gi* double mutant, where  
157 flowering time was unaffected by the photoperiod (Figure 1A). Moreover, while under LD and ND  
158 flowering time of *elf3 gi* was similar to *gi*, it was similar to *elf3* under SD (Figure 1A). Thus, unlike *ELF4*,  
159 where *GI* is epistatic under both LD and SD (Kim et al., 2012), no clear genetic hierarchy was observed  
160 between *ELF3* and *GI*, suggesting independent roles in flowering-time control.

161 Since transition from the vegetative to the reproductive phase is only one of several developmental  
162 processes influenced by the photoperiod, we next sought to determine whether *elf3 gi* is also insensitive  
163 to photoperiod during the early growth phase. A classic phenotypic output for vegetative growth is  
164 elongation of the juvenile stem (hypocotyl), which, like flowering time, is also determined by the length  
165 of the light period. In WT, the length of the photoperiod is inversely proportional to the length of the  
166 hypocotyl. However, this relationship is not linear. Until a critical photoperiod (14-16 h light) is reached,  
167 the growth inhibitory effect of the increased photoperiod remains intact. After this time point, a further  
168 increase in the photoperiod has almost no effect on growth (Niwa et al., 2009). To investigate the role of  
169 *ELF3* and *GI* in photoperiod growth control, we measured hypocotyl length of WT, *elf3*, *gi*, and *elf3 gi*  
170 seedlings grown under a range of photoperiods, from 24 hours darkness (DD), with a gradual increase of  
171 2 hour light periods, to 24 hours light (LL) (Figure 1B, S1A-B, Tables S1-S2). In confirmation of Niwa et al.  
172 (Niwa et al., 2009), an intact response to photoperiod was observed in WT with plants responding to an  
173 increase in day length with a decrease in hypocotyl length until the 16h photoperiod. After 16h, no  
174 significant decrease in hypocotyl length was observed. Albeit with an overall longer hypocotyl, WT-like  
175 response to the changing photoperiod was also observed in *gi* (Figure 1B, S1A-B, Tables S1-S2).  
176 Interestingly, both *elf3* and *elf3 gi* did not display an intact photoperiod response of growth inhibition.  
177 Unlike WT, the repressive action of longer photoperiods continued even after 16h. Notably, the effect of  
178 light repression was discontinued after 20h photoperiod in *elf3*, whereas, in *elf3 gi* it continued until LL  
179 (Figure 1B, S1A-B, Tables S1-S2). Thus, our data indicate a previously not recognized additive function of  
180 *ELF3* and *GI* in photoperiod sensing, which only becomes visible in the absence of both genes.

181 The EC controls hypocotyl elongation by regulating the expression of *PIF4* (Nusinow et al., 2011). Under  
182 LD and SD, the length of the *elf4 gi* double mutant is similar to *elf4*, indicating that *ELF4* is epistatic to *GI*  
183 (Kim et al., 2012). Since *ELF3*, like *ELF4*, is also a component of the EC, a similar genetic hierarchy could  
184 also be expected between *ELF3* and *GI*. If so, hypocotyl length of *elf3 gi* and *elf3* should be similar.  
185 However, we found that under both LD and SD *elf3 gi* was significantly longer than *elf3* (Figure 1B, Light  
186 periods 8 and 16), suggesting an additive function of *ELF3* and *GI*. Together, these data demonstrate  
187 that both *ELF3* and *GI* are essential for photoperiod sensing at both juvenile and adult stages of plant  
188 development.

### 189 **ELF3 promotes growth under blue light**

190 Previously, *ELF3* was reported solely as an inhibitor of growth under a range of light quantities and  
191 qualities (Zagotta et al., 1996; Reed et al., 2000; Doyle et al., 2002). In our light-period growth analysis,  
192 we observed that under LL *elf3* is significantly shorter than WT (Figure 1B, light period LL), suggesting  
193 that *ELF3* could act as a growth promoter under LL. To better understand the details of the *ELF3* growth  
194 promotion function, we first grew WT, *elf3*, *gi* and *elf3 gi* again under LL, LD, ND and SD photoperiods in  
195 white light. Consistent with Figure 1B, compared to WT *elf3* displayed longer hypocotyls under LD, ND  
196 and SD (Figure S1C-D). Under LL conditions, however, *elf3* hypocotyls were significantly shorter than WT  
197 (Figure S1C), confirming the initial observation from the experiment displayed in Figure 1B. To narrow  
198 down the light-spectrum, we next grew the seedlings under constant red or constant blue light, as well  
199 as under the corresponding monochromatic diurnal LD and SD conditions. Under red light, the results  
200 were similar to white light conditions under all photoperiods tested with single mutants including *elf3*  
201 being longer than WT and even longer double mutants (Figures 1C, S1E-F). While the same picture  
202 emerged for seedlings grown under blue light photoperiods that included a dark phase (Figures S1E-F),  
203 seedlings grown in constant blue light (BB) differed. Here, the *elf3* single mutant surprisingly displayed a  
204 significantly shorter hypocotyl compared to WT (Figure 1C). Although contradictory to the accepted  
205 understanding of being a general negative regulator of growth, these observations reveal a previously  
206 unknown growth promoting role of *ELF3* specifically under BB.

207 The growth inhibitory role of *ELF3* in white light is known to be exerted at least in part via *PIF4* (Nusinow  
208 et al., 2011). To better understand the *elf3* growth behavior under BB and to dissect the possibility of  
209 antagonistic action of *ELF3* on *PIF4* under these conditions, we measured the expression of *PIF4* and its  
210 direct targets *IAA29* and *YUC8*. Interestingly, under BB, albeit a higher *PIF4* expression in *elf3*, the levels  
211 of its target genes were lower than in WT (Figure 1D). This indicates that in the absence of *ELF3* alone,  
212 *PIF4* fails to fully induce the expression of its targets under BB, resulting in short hypocotyls. Provided  
213 that *ELF3* affects the expression levels of these *PIF4* target genes by acting on *PIF4* itself suggests that  
214 under BB *ELF3* exerts a growth promoting effect by positively influencing *PIF4* activity. Also in agreement  
215 with their extended growth phenotypes under BB, *elf3 gi* double mutants express higher levels of the  
216 growth promoting *PIF4* target genes (Figure 1D). A positive effect of *ELF3* on *PIF4* activity contradicts the  
217 previously described negative role of *ELF3* in the regulation of *PIF4* activity (Nieto et al., 2014). It is  
218 therefore possible that under BB *ELF3* does not directly act on *PIF4*, but rather affects one of its many  
219 negative regulators (Quint et al., 2016).

### 220 **ELF3 and GI repress growth during night and day, respectively**

221 Under diurnal conditions, the elongation of hypocotyl is gated by the circadian clock, allowing maximum  
222 growth to occur at dawn under LD (Nozue et al., 2007). By repressing growth during the night, *ELF3*

223 functions as an important factor in clock gating. Consistently, *elf3* mutants have been reported to lose  
224 the normal gating response, resulting in maximum growth during the night (Nozue et al., 2007; Box et  
225 al., 2014). The role of *GI* in clock-controlled growth, however, remains largely unknown. The additive  
226 growth phenotype of *elf3 gi* (Figure 1B), reveals two possibilities: first, both *ELF3* and *GI* work  
227 cooperatively at a similar time of day. If so, the loss of both in the *elf3 gi* double mutant results in an  
228 increased growth at that particular time. Alternatively, both repress growth at a different time of the  
229 day-night cycle, resulting in an enhanced growth in *elf3 gi* at separate times. To dissect these  
230 possibilities, we measured growth rate of WT, *elf3*, *gi* and *elf3 gi* every hour for two days under LD using  
231 infrared imaging, which allowed growth monitoring also in darkness (Figure 2A-D). As reported  
232 previously (Nozue et al., 2007), maximum growth in WT was observed during the early morning at  
233 around ZT4 (Figure 2A). In *elf3*, the growth rate was overall increased with maximum elongation  
234 detected during the night (Figure 2B, Table S3), confirming the night-specific repressive function of *ELF3*  
235 in elongation growth. The *gi* mutant displayed a broader growth peak during the afternoon with  
236 maximum growth observed at ZT8-10 (Figure 2C, Table S3). In *elf3 gi*, growth was pronounced during  
237 the night. However, in contrast to WT and both single mutants, growth rates did not peak at a specific  
238 time of day, but instead remained on a rather constant level. Compared to WT and the single mutants,  
239 the rate of elongation growth was increased during both day and night (Figure 2D, Table S3). Taken  
240 together, while we can confirm the previously described growth-repressive role of *ELF3* during the night,  
241 our results reveal an unknown role of *GI* in repressing growth specifically during day times. For effective  
242 gating of clock-controlled growth, both *ELF3* and *GI* are essential.

#### 243 ***ELF3* and *GI* work independently in the circadian clock**

244 Since *ELF3* and *GI* are important components of the circadian clock (Mizoguchi et al., 2005; Anwer et al.,  
245 2014), we asked whether the photoperiod insensitivity of *elf3 gi*, as revealed by growth and flowering  
246 behavior shown above, could be attributed to a malfunctional oscillator. To investigate the interactive  
247 role of *ELF3* and *GI* in the clock, we monitored the expression of the *CCR2:LUC* reporter under constant  
248 light (LL) in WT, *elf3*, *gi* and *elf3 gi* plants that were previously entrained under LD, ND or SD (Figure 3).  
249 As expected for a functional oscillator, WT displayed a robust rhythm. In contrast, no rhythmic  
250 expression of the reporter was detected in *elf3* and *elf3 gi*. The *gi* mutant was also rhythmic albeit with  
251 lower amplitude (Figure 3A). Moreover, the levels of *CCR2:LUC* in *elf3 gi* were higher than the WT, and  
252 the single mutants *elf3* and *gi* (Figure 3A-B), indicating an independent repressive function of *ELF3* and  
253 *GI* in the clock.

254 Using the same data, we next calculated the free-running period of the aforementioned lines.  
255 Irrespective of the photoperiod provided for entrainment, we found that the WT displayed a similar  
256 free-running period (Figure 3C). Compared to WT, an acceleration in clock speed was observed in *gi*  
257 (Figure 3C). Like WT, the photoperiod used during entrainment had no effect on *gi* periodicity (Figure  
258 3C). Consistent with their arrhythmic phenotypes, no regular pattern of periodicity response to  
259 photoperiod was detected in *elf3* and *elf3 gi*. While *elf3* displayed an overall deceleration in circadian  
260 periodicity after all entrainment photoperiods, the *elf3 gi* response was more random, with a long and  
261 short period after LD and ND entrainment, respectively. After SD entrainment, the period of *elf3 gi* was  
262 similar to that of the WT (Figure 3C).

263 Next we assessed the precision of the oscillator by calculating the relative amplitude error (RAE). An RAE  
264 value of “0” represents a perfect rhythm, whereas an RAE of “1” typifies no rhythm (Anwer et al., 2014).



265 A general cutoff value of 0.5 is normally used to distinguish between a robust and a dysfunctional  
266 oscillator. As expected for a fully functional clock, the WT displayed a very low RAE after all  
267 entrainments (Figure 3D). The RAE measured for *gi* was significantly higher than the WT but lower than  
268 0.5, suggesting a compromised but functional clock (Figure 3D). Consistent with their arrhythmic  
269 phenotype, the RAEs of *elf3* and *elf3 gi* were extremely high (RAE>0.6), indicating a dysfunctional  
270 oscillator. Collectively, a dysfunctional oscillator along with an increased *CCR2:LUC* expression in *elf3 gi*  
271 indicate an additive/synergistic role *ELF3* and *GI* in the clock.

## 272 **Clock entrainment to light signals requires both a functional *ELF3* and *GI***

273 Several clock mutants that are arrhythmic under free-running conditions, display robust oscillations  
274 under diurnal conditions, suggesting that the oscillator is still capable of reacting to persistent  
275 environmental changes (Yamashino et al., 2008). The complete lack of response of the *elf3 gi* double  
276 mutant to photoperiod (Figure 1A-B and S1A-B), however, prompted us to think otherwise. Specifically,  
277 we hypothesized that the oscillator in *elf3 gi* might not be responsive to light signals even under diurnal  
278 conditions. To test this hypothesis, we monitored the expression of major central-oscillator genes *CCA1*,  
279 *TOC1*, *PRR9*, *GI* and *ELF3* under diurnal conditions (ND) (Figure 4A-E). In WT, the expression profiles of all  
280 these genes were consistent with previous data (Kolmos et al., 2011; Anwer et al., 2014), with *CCA1* and  
281 *PRR9* peaking in the morning, *TOC1* and *GI* peaking in the evening, whereas *ELF3* peaks in the night  
282 (Figure 4A-E). In *gi*, the expression of *TOC1* and *ELF3* was higher than the WT, whereas the levels of  
283 *PRR9* was lower than WT (Figure 4B-C,E), consistent with previous reports for *gi* null mutants (Fowler et  
284 al., 1999; Kim et al., 2012). No obvious difference in *CCA1* expression was detected in *gi* (Figure 4A). Also  
285 in agreement with published data, expression of *TOC1*, *PRR9* and *GI* in *elf3* was higher than in WT, while  
286 *CCA1* expression was lower (Hall et al., 2003; Kolmos et al., 2011; Anwer et al., 2014) (Figure 4A-D).  
287 Importantly, in both *elf3* and *gi*, albeit differences in expression levels, the overall shape of the  
288 expression patterns of all genes tested was similar to WT (Figure 4A-E). These data thus indicate an  
289 aberrant but functional oscillator in *elf3* and *gi* single mutants, which is capable of responding to  
290 environmental signals and generating robust rhythms under diurnal conditions. In *elf3 gi* double mutant,  
291 however, no detectable response to diurnal light signals were observed (Figure 4A-E). The expression  
292 profile of all clock genes tested were completely different from both single mutants and WT. Specifically,  
293 the overall expression of *PRR9* and *ELF3* was higher than the other genotypes tested. *CCA1* levels were  
294 almost non-detectable. The overall expression of *TOC1* was increased compared to WT and *gi* but  
295 decreased compared to *elf3*. The *GI* abundance was higher and lower in WT and *elf3*, respectively  
296 (Figure 4A-E). Most importantly, the characteristic peaks of expression of these genes, which were  
297 clearly detectable in WT, *elf3* and *gi*, were absent in *elf3 gi*. Most of the genes displayed a constant  
298 higher or lower expression, which was irresponsive to changes in the light during a diurnal cycle (Figure  
299 4A-E). These data demonstrate that only in the absence of both *ELF3* and *GI*, the circadian oscillator is  
300 insensitive to persistent light-input cues. Thus, *ELF3* and *GI* are essential *Zeitnehmers* that are required  
301 for clock entrainment to external light cycles.

## 302 ***ELF3* and *GI* are essential to establish endogenous and light signaling links**

303 Once entrained, the circadian clock regulates several key endogenous processes such as gene expression  
304 and ensures their precise synchronization with the external environment. This internal-external signaling  
305 synchronization is vital for several clock-controlled pathways such as flowering time and hypocotyl  
306 elongation. Since the oscillator in *elf3 gi* failed to establish a link with the external light signals, such a

307 synchronization could potentially be lost in *elf3 gi*, explaining its photoperiod-insensitive flowering and  
308 growth. This could be tested by monitoring the diurnal expression of key clock-regulated genes that are  
309 involved in photoperiod-responsive flowering and hypocotyl elongation as a proxy.

310 To investigate the functional ability of the *elf3 gi* oscillator to regulate its target genes, we first  
311 monitored the expression of the key flowering-time genes *GI*, *CO* and *FT* under ND (Figure 5A-C).  
312 Consistent with previous reports, we detected a rhythmic expression of *GI*, *CO* and *FT* in WT (Fowler et  
313 al., 1999; Sawa and Kay, 2011), with *GI* expressing during the day with the peak levels at ZT8, *CO*  
314 showing dual peaks, a smaller one at ZT8 and another one at ZT16-20. The maximum levels of *FT* were  
315 detected at dusk, at ZT12 (Figure 5A-C). Consistent with the late flowering phenotype of the *gi* null  
316 mutant, the expression of *CO* and *FT* was barely detectable in *gi* (Figure 5B,C). In *elf3*, the expression of  
317 *GI* was higher at almost all time points (Figure 5A), consistent with the direct repression of *GI* by *ELF3*  
318 (Mizuno et al., 2014; Ezer et al., 2017). The expression of *CO* was higher during the early day and again  
319 during the night, whereas *FT* expression was only elevated during the day at ZT4 (Figure 5A-C). The  
320 expression pattern of *CO* and *FT* in *elf3 gi* was similar to *gi*. Notably, no diurnal peak of expression was  
321 observed in the *elf3 gi* double mutant for any of the genes tested, with the overall expression hardly  
322 fluctuating over the entire diurnal cycle (Figure 5A-C).

323 We further validated these results by monitoring the expression of the major growth promoter *PIF4*  
324 under ND (Figure 5D). Consistent with their long hypocotyls, an overall higher expression of *PIF4* was  
325 observed in *elf3* and *gi* (Figure 5D). Furthermore, in *gi*, *PIF4* followed a similar clock-regulated diurnal  
326 pattern as that of WT, albeit with marginally but consistently higher levels (Figure 5D). *PIF4* expression in  
327 *elf3* also followed a diurnal pattern. However, it showed a characteristic light regulated profile, with a  
328 gradual decrease in expression during the light period and a gradual increase during the dark period  
329 (Figure 5D). Interestingly, the *PIF4* expression in the *elf3 gi* double mutant was completely different  
330 from the diurnal patterns in WT and single mutants. Compared to WT, the level of *PIF4* was higher in  
331 *elf3 gi* at almost all time points, explaining for example its extreme growth phenotype shown in Figure 2.  
332 Further, *elf3 gi* displayed neither the clock regulated *PIF4* profile as observed for *gi*, nor the light  
333 regulated expression as observed in *elf3* (Figure 5D). A closer examination revealed that the *PIF4* levels  
334 remained almost similar throughout the diurnal cycle with the exception of ZT16 where expression  
335 levels were increased in comparison to other time points (Figure 5D). Collectively, these data  
336 demonstrate that both *ELF3* and *GI* are required for clock entrainment and thereby for the generation of  
337 rhythmic endogenous processes synchronized with the external signals.

338 **Discussion:**

339 The circadian clock is an important time keeping mechanism that synchronizes the internal cellular  
340 mechanism to the external environment. Light is the primary cue that provides timing information to the  
341 clock (Inoue et al., 2017; Oakenfull and Davis, 2017). While light sensing by the photoreceptors is well  
342 understood, it remains unclear how this information is perceived by the central oscillator. Here, we  
343 show that clock components *ELF3* and *GI* are essential to perceive light input into the clock and thereby  
344 for the measurement of the photoperiod. Absence of these components results in a dysfunctional  
345 oscillator, even under diurnal conditions, failing to regulate photoperiod-responsive growth and  
346 development.

347 Single loss of function mutants of individual EC components exhibit similar clock, hypocotyl and  
348 flowering time phenotypes, indicating that they work cooperatively (Nusinow et al., 2011; Herrero et al.,  
349 2012). Recent biochemical data has suggested that *ELF3* can also function independently of the EC  
350 (Nieto et al., 2014). However, conclusive genetic evidence supporting the biochemical data is lacking.  
351 Previous data reported a clear genetic hierarchy between *ELF4* and *GI* with *ELF4* being epistatic to *GI* in  
352 control of hypocotyl elongation. *Vice versa*, *GI* is epistatic to *ELF4* in flowering time regulation (Kim et al.,  
353 2012). In our study, we did not observe such genetic relationships for *ELF3* and *GI*. Taking into account  
354 that *ELF3* and *ELF4* function together in the EC (Nusinow et al., 2011; Herrero et al., 2012), this is  
355 somewhat surprising, supporting the proposed EC independent function for *ELF3* (Nieto et al., 2014).  
356 The phenotypes we observed in single and double mutants for hypocotyl elongation suggest an additive  
357 function of *ELF3* and *GI* in controlling elongation growth (Figure 1B, S1A-F), whereas in flowering time  
358 regulation *ELF3* and *GI* were epistatic to each other under SD and LD, respectively. In circadian clock  
359 control, *elf3 gi* displayed similar additive/synergistic phenotypes (Figure 3A-B) as reported for *ELF4* and  
360 *GI*. Collectively, in agreement with the biochemical data, our genetic analyses demonstrate that *ELF3*  
361 function is not solely dependent on the EC.

362 *ELF3* has been established as a repressor of growth that mainly works by acting on *PIF4* (Nusinow et al.,  
363 2011; Nieto et al., 2014). Under diurnal conditions, the role of *ELF3* as a growth inhibitor is undisputed.  
364 However, under constant light, contradictory phenotypes of *elf3* mutants were reported. Under LL, *elf3*  
365 mutants displayed either similarly long or slightly longer hypocotyls (Liu et al., 2001; Kim et al., 2005)  
366 compared to WT (Doyle et al., 2002; Park et al., 2017). Consistent with previous data (Kim et al., 2005;  
367 Kolmos et al., 2011; Nusinow et al., 2011; Lu et al., 2012; Anwer et al., 2014; Box et al., 2014; Raschke et  
368 al., 2015), under a range of photoperiods and light spectra, we consistently observed an elongated  
369 hypocotyl of *elf3* (Figure 1B, S1A-F). However, under LL, *elf3* was significantly shorter than WT (Figure  
370 1B, S1C). Further experiments under different light spectra revealed that the growth promoting function  
371 of *ELF3* was photoreceptor dependent. Specifically, the *elf3* was shorter than WT under BB (Figure 1C).  
372 Interestingly, under these conditions *PIF4* levels were still increased in *elf3*, but it failed to induce the  
373 expression of its target genes *IAA29* and *YUC8*, indicating the possibility of a decreased *PIF4* activity  
374 (Figure 1E, S2B). Collectively, while our data consolidate the known growth inhibitory role of *ELF3* in  
375 *PhyB* mediated hypocotyl elongation, we propose a novel function of *ELF3* as a growth enhancer under  
376 BB. The underlying molecular mechanism of *ELF3* mediated growth promotion remains unknown.  
377 However, based on its known transcription/activity repressor function (Nieto et al., 2014; Ezer et al.,  
378 2017), it seems likely that *ELF3* inhibits the function of a growth repressor under BB. If so, *CRY1* would  
379 represent an attractive candidate. In support of this hypothesis, *CRY1* and *PIF4* have been shown to  
380 physically interact and bind to the same promoter regions (Ma et al., 2015; Pedmale et al., 2015). This

381 binding decreases PIF4 transcriptional activity in a blue light dependent manner (Ma et al., 2015), which  
382 could be explained by a competitive repressor-of-the-repressor model. In this model, CRY1 represses  
383 PIF4 transcriptional activity and ELF3 represses CRY1's ability to inhibit PIF4 activity. De-repression of  
384 PIF4 would therefore facilitate activation of PIF4 target genes. This model is in line with the known  
385 function of ELF3 as a light signaling inhibitor (McWatters et al., 2000; Kolmos et al., 2011).

386 The molecular mechanism by which GI controls growth is not fully understood. An elongated hypocotyl  
387 of *gi* mutants under red and blue light suggested a repressive role in photoreceptor mediated growth  
388 inhibition (Huq et al., 2000; Martin-Tryon et al., 2007). Recent data demonstrated that GI requires PIF4  
389 for growth regulation (de Montaigu et al., 2014; Fornara et al., 2015). Since the EC regulates *PIF4*  
390 (Nusinow et al., 2011) and *ELF4* is epistatic to *GI* (Kim et al., 2012), a role of *GI* upstream of the EC in  
391 growth regulation has been proposed (de Montaigu et al., 2014). However, our data, especially an  
392 additive hypocotyl phenotype and increased levels of *PIF4* in *elf3 gi* (Figure 1B-E, 5D), advocate an  
393 independent repressive action of GI on *PIF4*.

394 As growth and developmental phenotypes investigated in this study depend on the circadian clock, we  
395 asked whether ELF3's and GI's function in the clock might be able to explain the observed effects. By a  
396 "gating" mechanism the clock ensures that maximum growth happens at the correct time of day. In WT,  
397 under LD growth rates peak in the early morning coinciding with the maximum expression of *PIF4*  
398 (Nozue et al., 2007). To coordinate this timing of growth rates, TOC1 and EC components including ELF3  
399 repress growth during the late-evening and night, respectively (Nozue et al., 2007; Box et al., 2014; Zhu  
400 et al., 2016). In this study, we demonstrate that *GI* is also essential for clock mediated gating. GI  
401 represses growth during mid-day to late afternoon, thereby contributing to restricting growth peaks to  
402 the morning, resulting in normal rhythmic growth. Consistently, the loss of day and night time gating  
403 response in *elf3 gi* double mutants results in uncontrolled elongation growth (Figure 2D). Based on these  
404 observations we propose a model of rhythmic growth incorporating *ELF3* and *GI*. In that model ELF3 and  
405 GI gate growth mainly by repressing *PIF4* during the night and late afternoon, respectively, allowing it to  
406 accumulate only during the early morning under LD. The morning accumulation of *PIF4* induces its  
407 downstream targets that consequently trigger cellular growth (Figure 5E).

408 The gating properties of the circadian clock are mainly dependent on its ability to synchronize internal  
409 cellular mechanisms with the external environment. Although after entrainment the clock maintains the  
410 same rhythm in the absence of the external input, in nature these free-running conditions almost never  
411 exist. Thus, proper clock responses to consistent external cues during a diurnal cycle are crucial for the  
412 synchronization of endogenous and environmental signals. Interestingly, arrhythmic clock genotypes,  
413 such as null mutants of the EC members *ELF3*, *ELF4* and *LUX*, as well as overexpressors of *CCA1* and  
414 *TOC1*, exhibit a non-functional oscillator under free-running conditions, but they are fully capable of  
415 generating robust rhythms under diurnal conditions (Fowler et al., 1999; Makino et al., 2002; Hall et al.,  
416 2003; Kolmos et al., 2011; Kim et al., 2012). Even higher order clock mutants including *cca1-1 lhy-11*  
417 *toc1-2*, which lack the entire central oscillator, can generate rhythms under cycling conditions  
418 (Yamashino et al., 2008). The data presented in this study demonstrate that the absence of the two  
419 components *ELF3* and *GI* is sufficient to make the oscillator arrhythmic under both free-running and  
420 even under diurnal conditions (Figure 4A-E). We demonstrated that ELF3 and GI serve as important  
421 *Zeitnehmers* that are essential for clock entrainment. In their absence, the oscillator cannot perceive  
422 external timing cues provided by cycling light conditions and thus fails to generate rhythmic oscillation  
423 of the downstream endogenous outputs. A closer look at the transcriptional profile of the major core-

424 oscillator genes and the clock-regulated output genes under diurnal conditions in *elf3 gi* suggests that  
425 the entire clock-regulated transcriptome seems arrested (Figure 4A-E). As such, even changes in the  
426 environmental conditions during a diurnal cycle had no effect on the oscillator and were unable to  
427 release the clock-regulated transcriptome from its arrested state (Figure 5A-D). This should rationally  
428 lead to a breakdown of any clock-control output pathway. Consistently, photoperiod-responsive  
429 flowering and growth was disrupted in *elf3 gi* (Figure 1A-B). Notably, light regulated processes that are  
430 independent of the circadian clock seem to be intact in *elf3 gi*. A continuous inhibition of hypocotyl  
431 length under increasing photoperiod (Figure 1B, Tables S1-S2) along with marked differences in growth  
432 rate during the light and dark phase in *elf3 gi* support this notion (Figure 2D, Table S3). Collectively, our  
433 data demonstrate that *ELF3* and *GI* control the circadian clock Zeitgeber-Zeitnehmer interface, enabling  
434 the oscillator to synchronize internal cellular mechanisms to the external environment.

435 Orthologues of *ELF3* and *GI* have been identified in several higher plants. Both genes have been prime  
436 breeding targets in crops for flowering time (Faure et al., 2012; Bendix et al., 2015; Panigrahi and  
437 Mishra, 2015; Huang and Nusinow, 2016). The *elf3 gi* double mutants develop rather normally and  
438 flower at the same time irrespective of the photoperiod (Figure 1A-B). If similar genetic and functional  
439 relationships between *ELF3* and *GI* exist in economically important crops as reported here for  
440 Arabidopsis, breeders could develop photoperiod-insensitive varieties lacking *ELF3* and *GI* that would be  
441 independent of latitudinal photoperiodicity (Soyk et al., 2016).

## 442 **Materials and methods:**

### 443 **Plant material**

444 All genotypes used were in Ws-2 genetic background. The *elf3-4* null mutant (Liu et al., 2001) was  
445 previously described in (Zagotta et al., 1996; Hicks et al., 2001). The *gi-158* mutant was obtained in an  
446 ENU (*N*-ethyl-*N*-nitrosourea) genetic screen and will be explained elsewhere. The *gi-158* is possibly a null  
447 mutant that contains a premature stop codon resulting in a truncated protein of 146/1173 amino acids.  
448 The flowering time and hypocotyl phenotypes of *gi-158* were very similar to the *gi-11* null mutant  
449 (Fowler et al., 1999) (Figure S2A-B). The double mutant *elf3-4 gi-158* was generated by crossing *elf3-4*  
450 and *gi-158*, and was confirmed by genotyping (Figure S2C). Marker used for genotyping were: *gi-158*,  
451 (forward ACTCATTACAACCGTCCCATCTA, reverse, GCGCATGAACACATAGAAGC (XbaI) *elf3-4* (forward  
452 TGCAGATAAAGGAGGGCCTA, reverse, ATGGTCCAGGATGAACCAAA.

### 453 **Growth conditions**

454 For luciferase assays, seeds were surface-sterilized and plated on MS medium containing 3% sucrose.  
455 Following ~3 days stratification at 4°C, seedlings were entrained for 7 days, either under LD, ND, SD  
456 cycles (~100 μmol m<sup>-2</sup>s<sup>-1</sup>) with constant temperature of 20°C (LD). The bioluminescence measurement  
457 and data analysis was performed as described (Hanano et al., 2008). For hypocotyl assays, seedlings  
458 were grown on ATS medium, as described previously (Lincoln et al., 1990). Hypocotyl length was  
459 determined for seedlings grown under varying photoperiod for 7 days or under RR or BB (light intensity  
460 white fluorescent light, 90 μmol m<sup>-2</sup>s<sup>-1</sup>; light intensity RR and BB: monochromatic LED, 20 μmol m<sup>-2</sup>s<sup>-1</sup>).  
461 The correct spectrum and intensities of red and blue light was confirmed by a spectrometer (UPRtek®  
462 MK350S). Seedlings were imaged, and hypocotyl elongation was measured using the *Rootdetection*  
463 program (<http://www.labutils.de/rd.html>). For flowering time measurement, plants were grown on soil  
464 containing a 3:1 mixture of substrate and vermiculite in phytochambers (Johnson) with LD, ND, SD cycle  
465 (white fluorescent light: 90 μmol m<sup>-2</sup>s<sup>-1</sup>, constant 22°C). Flowering time was scored at the time of bolting  
466 (1 cm above rosette leaves) as the total number of days to bolt. For all experiments, data loggers were  
467 used to monitor the growth conditions.

### 468 **Infra-red photography for growth rate measurement**

469 Seedlings were grown as described above with the following exception: to facilitate imaging  
470 unobstructed in air, seedlings were grown vertically on an agar ledge formed by removing part of agar in  
471 a square petri plate. Seeds were placed in small ridges on top of the agar. Imaging was started as soon  
472 as the cotyledons emerged from the seed coat. Photographs were taken every 60 minutes for 48 hours  
473 in LD cycles (white fluorescent light: 30 μmol m<sup>-2</sup>s<sup>-1</sup>, constant 20°C). To image growth in day-night cycles  
474 we built an infrared imaging platform consisting of a modified camera with IR long pass 830 nm cut  
475 filters (Panasonic G5). Illumination was achieved using 880 nm IR backlights (Kingbright BL0106-15-29).  
476 Image stacks were analyzed using ImageJ (Wayne Rasband, National Institutes of Health, USA,  
477 <http://rsb.info.nih.gov/ij>). Data loggers were used to monitor the growth conditions.

### 478 **Expression Analysis**

479 Total RNA was isolated with NucleoSpin® RNA Plant (Macherey-Nagel) following the manufacturer's  
480 protocol from 1-week-old seedlings entrained in 12L:12D (90 μmol m<sup>-2</sup>s<sup>-1</sup>, constant 20°C). Light  
481 intensities for BB were 20 μmol m<sup>-2</sup>s<sup>-1</sup>. Quantitative RT-PCR, and primer sequences were previously

482 described (Kolmos et al., 2009) with following modifications: ABsolute Blue qPCR SYBR Green  
483 (ThermoFisher®) was used instead of iQ SYBR Green (Biorad). Agilent Mx3005P or AriaMx realtime  
484 system (Agilent®) were used instead of BioRad. Data loggers were used to monitor the growth  
485 conditions.

#### 486 **Figure Legends:**

#### 487 **Figure 1. Photoperiod-responsive flowering and hypocotyl elongation require functional *ELF3* and *GI*.**

488 **(A)** Flowering time of *Ws-2*, *elf3*, *gi* and *elf3 gi* under LD (16h light: 8 h darkness), ND (12h light: 12h  
489 darkness), and SD (8h light: 16h darkness). Flowering time was counted as number of days to 1cm bolt.  
490 Error bars represent standard deviation (StD).  $n \geq 24$ . Letters above the bars represent statistically  
491 significant differences calculated using one-way ANOVA (ANalysis Of VAriance) with post-hoc Tukey HSD  
492 (Honestly Significant Difference) Test,  $p < 0.01$ . **(B)** Hypocotyl length of *Ws-2*, *elf3*, *gi* and *elf3 gi* under  
493 different photoperiods. Numbers at X-axis represent the length of the light period. For instance '8'  
494 typify (8h light: 16h darkness), and 12 (12h light: 12h darkness). DD and LL represent constant darkness  
495 and constant light, respectively. Seedling were grown for seven days under the respective photoperiod  
496 at constant 20°C. Error bars represent standard deviation.  $n \geq 18$ . Letters above the bars represent  
497 statistically significant differences among four genotypes under the specified photoperiod (ANOVA with  
498 post-hoc Tukey HSD Test,  $p < 0.01$ ). **(C)** Hypocotyl length of *Ws-2*, *elf3*, *gi* and *elf3 gi* under constant red  
499 (RR) or constant blue (BB) light. Plants were grown for 7 days under monochromatic red or blue light at  
500 constant 20°C before the pictures were taken and hypocotyl length was measured. Significance as  
501 described in **(B)** calculated separately for RR and BB. Experiment was repeated at least three times with  
502 similar results. **(D)** Expression of *PIF4*, *IAA29* and *YUC8* under constant blue (BB) light. Plants were grown  
503 for 7 days under monochromatic blue light at constant 20°C before the samples were harvested. Error  
504 bars represent the standard error of the mean (SEM) of three biological replicates. Significance as  
505 described above,  $P < 0.05$ . See also Figure S1, Table S1, and Table S2.

#### 506 **Figure 2. *ELF3* and *GI* repress growth during night and day respectively.**

507 **(A-D)** Growth rate of *Ws-2*, *elf3*, *gi* and *elf3 gi* under LD. Starting from the third day photographs were  
508 taken every one hour using a modified Infra red camera. To measure new growth, the time-lapsed  
509 images were imported into ImajeJ and hypocotyl length was measured (please see materials and  
510 methods for details). Non-shaded area in the graph represents light period (day), and shaded area  
511 represents dark period (night). Error bars represent standard error of the mean (S.E.M.),  $n \geq 8$ .  
512 Experiment was repeated at least three times with similar results. See also Table S3.

#### 513 **Figure 3. *ELF3* and *GI* work independently in circadian clock.**

514 **(A)** Free-running profile of *CCR2::LUC* expression in *Ws-2*, *elf3*, *gi* and *elf3 gi*. The plants were entrained  
515 for 7 days under 12h:12h light dark cycles, followed by transfer to LL and measurement of *CCR2::LUC*  
516 expression for 5 days. Error bars represent SEM and are shown on every third reading. **(B)** absolute  
517 Luminescence values of the *CCR2::LUC* profiles shown in (A). Error bars are SEM,  $n=48$ . Significance as  
518 described in Figure 1. **(C)** Period and **(D)** R.A.E. estimates after entrainment under different  
519 photoperiods. Plants were entrained for 7 days under LD, ND or SD before releasing into the free-  
520 running condition of constant light and temperature. The *CCR2::LUC* profiles were monitored for 5 days  
521 under free-running and period and R.A.E. was calculated. Error bars are SEM,  $n=48$ . Significance as

522 described in Figure 1. Because of the arrhythmic nature of the *elf3* and *elf3 gi*, these lines were excluded  
523 from statistical analysis in (C).

524 **Figure 4. *ELF3* and *GI* are required for clock entrainment.**

525 **(A-E)** Transcript accumulation of different circadian clock genes *CCA1* (A), *TOC1* (B), *PRR9* (C), *GI* (D) and  
526 *ELF3* (E) in *Ws-2*, *elf3*, *gi* and *elf3 gi* (*elf3 gi*) under ND (12h light: 12h darkness). Error bars represent the  
527 standard deviation of three technical repeats. Expression levels were normalized for *PROTEIN 19*  
528 *PHOSPHATASE 2a subunit A3* (*PP2A*). Experiment was repeated with similar results. Open bars in the  
529 graph represent time in LL, and closed bar represents time in DD.

530 **Figure 5. Endogenous and environmental signals synchronization require functional *ELF3* and *GI*.**

531 **(A-D)** Transcript accumulation of flowering time genes *GI* (A), *CO* (B) and *FT* (C) and major growth  
532 promoter *PIF4* (D) in *Ws-2*, *elf3*, *gi* and *elf3 gi* (*elf3 gi*) under ND (12h light: 12h darkness). Error bars  
533 represent the standard deviation of three technical repeats. Expression levels were normalized for  
534 *PROTEIN 19 PHOSPHATASE 2a subunit A3* (*PP2A*). Experiment was repeated with similar results. Open  
535 bars in the graph represent time in LL, and closed bar represents time in DD. **(E)** A model of hypocotyl  
536 growth. *ELF3* and *GI* repress growth during the night and late-day, respectively by repressing the  
537 expression of *PIF4*.

538 **Figure S1.**

539 **(A-B)** Hypocotyl length of *Ws-2*, *elf3*, *gi* and *elf3 gi* under different photoperiods as shown in Figure 1B .  
540 For clarification, data is split into two photoperiod ranges **(A)** 0-12 and **(B)** 12-24. Growth condition,  
541 error bars and statistical analysis as described in Figure 1B. **(C-D)** Hypocotyl length of *Ws-2*, *elf3*, *gi* and  
542 *elf3 gi* under constant white light (LL) , LD, SD and ND. Significance as described in Figure 1. **(E-F)**  
543 Hypocotyl growth under monochromatic red or blue light with LD or SD photocycles. Plants were grown  
544 for 7 days at constant 20°C.

545 **Figure S2. *gi-158* is a null mutant.**

546 **(A)** Flowering time of *Ws-2*, *gi-158* and *gi-11* under LD (16h light: 8 h darkness), 1212 (12h light: 12h  
547 darkness), and SD (8h light: 16h darkness). Flowering time was counted as number of days to 1cm bolt.  
548 Error bars represent standard deviation, n≥24. **(B)** Hypocotyl length of *Ws-2*, *gi-158* and *gi-11* under ND.  
549 Significance as described in Figure 1 within a specific photoperiod. **(C)** confirmation of the *elf3 gi* mutant  
550 by genotyping. Two independent double mutant lines were obtained after crossing: *elf3 gi* (1) and *elf3*  
551 *gi* (2). After genotypic and phenotypic confirmation, only one line *elf3 gi* (1) was used for further  
552 experiments.

553



554 **References:**

- 555 Alabadi D, Oyama T, Yanovsky MJ, Harmon FG, Más P, Kay SA (2001) Reciprocal Regulation Between  
556 TOC1 and LHY/CCA1 Within the Arabidopsis Circadian Clock. *Science* 293: 880-883
- 557 Andres F, Coupland G (2012) The genetic basis of flowering responses to seasonal cues. *Nat Rev Genet*  
558 13: 627-639
- 559 Anwer MU, Boikoglou E, Herrero E, Hallstein M, Davis AM, Velikkakam James G, Nagy F, Davis SJ,  
560 Mockler TC (2014) Natural variation reveals that intracellular distribution of ELF3 protein is  
561 associated with function in the circadian clock. *eLife*
- 562 Anwer MU, Davis SJ (2013) An overview of natural variation studies in the Arabidopsis thaliana circadian  
563 clock. *Seminars in Cell & Developmental Biology* 24: 422-429
- 564 Bendix C, Marshall Carine M, Harmon Frank G (2015) Circadian Clock Genes Universally Control Key  
565 Agricultural Traits. *Molecular Plant* 8: 1135-1152
- 566 Box Mathew S, Huang BE, Domijan M, Jaeger Katja E, Khattak Asif K, Yoo Seong J, Sedivy Emma L, Jones  
567 DM, Hearn Timothy J, Webb Alex AR, Grant A, Locke James CW, Wigge Philip A (2014) ELF3  
568 Controls Thermoresponsive Growth in Arabidopsis. *Current Biology*
- 569 Chou M-L, Yang C-H (1999) Late-Flowering Genes Interact with Early-Flowering Genes to Regulate  
570 Flowering Time in *Arabidopsis thaliana*. *Plant and Cell Physiology* 40: 702-708
- 571 David KM, Armbruster U, Tama N, Putterill J (2006) Arabidopsis GIGANTEA protein is post-  
572 transcriptionally regulated by light and dark. *FEBS Lett* 580: 1193-1197
- 573 de Montaigu A, Coupland G (2017) The timing of GIGANTEA expression during day/night cycles varies  
574 with the geographical origin of Arabidopsis accessions. *Plant Signaling & Behavior*: 00-00
- 575 de Montaigu A, Giakountis A, Rubin M, Tóth R, Cremer F, Sokolova V, Porri A, Reymond M, Weinig C,  
576 Coupland G (2014) Natural diversity in daily rhythms of gene expression contributes to  
577 phenotypic variation. *Proceedings of the National Academy of Sciences*
- 578 de Montaigu A, Toth R, Coupland G (2010) Plant development goes like clockwork. *Trends Genet* 26:  
579 296-306
- 580 Doyle MR, Davis SJ, Bastow RM, McWatters HG, Kozma-Bognar L, Nagy F, Millar AJ, Amasino RM (2002)  
581 The ELF4 gene controls circadian rhythms and flowering time in Arabidopsis thaliana. *Nature*  
582 419: 74-77
- 583 Ezer D, Jung J-H, Lan H, Biswas S, Gregoire L, Box MS, Charoensawan V, Cortijo S, Lai X, Stöckle D, Zubieta  
584 C, Jaeger KE, Wigge PA (2017) The evening complex coordinates environmental and endogenous  
585 signals in Arabidopsis. *3*: 17087
- 586 Faure S, Turner AS, Gruszka D, Christodoulou V, Davis SJ, von Korff M, Laurie DA (2012) Mutation at the  
587 circadian clock gene EARLY MATURITY 8 adapts domesticated barley (*Hordeum vulgare*) to short  
588 growing seasons. *Proceedings of the National Academy of Sciences*
- 589 Fornara F, de Montaigu A, Sánchez-Villarreal A, Takahashi Y, Ver Loren van Themaat E, Huettel B, Davis  
590 SJ, Coupland G (2015) The GI-CDF module of Arabidopsis affects freezing tolerance and growth  
591 as well as flowering. *The Plant Journal* 81: 695-706
- 592 Fornara F, Panigrahi KCS, Gissot L, Sauerbrunn N, Rühl M, Jarillo JA, Coupland G (2009) Arabidopsis DOF  
593 Transcription Factors Act Redundantly to Reduce CONSTANS Expression and Are Essential for a  
594 Photoperiodic Flowering Response. *Developmental Cell* 17: 75-86
- 595 Fowler S, Lee K, Onouchi H, Samach A, Richardson K, Morris B, Coupland G, Putterill J (1999) GIGANTEA:  
596 a circadian clock-controlled gene that regulates photoperiodic flowering in Arabidopsis and  
597 encodes a protein with several possible membrane-spanning domains. *EMBO J* 18: 4679-4688
- 598 Hall A, Bastow RM, Davis SJ, Hanano S, McWatters HG, Hibberd V, Doyle MR, Sung S, Halliday KJ,  
599 Amasino RM, Millar AJ (2003) The TIME FOR COFFEE Gene Maintains the Amplitude and Timing  
600 of Arabidopsis Circadian Clocks. *The Plant Cell Online* 15: 2719-2729

- 601 Hanano S, Stracke R, Jakoby M, Merkle T, Domagalska MA, Weisshaar B, Davis SJ (2008) A systematic  
602 survey in *Arabidopsis thaliana* of transcription factors that modulate circadian parameters. *BMC*  
603 *Genomics* 9: 182-182
- 604 Helfer A, Nusinow DA, Chow BY, Gehrke AR, Bulyk ML, Kay SA (2011) LUX ARRHYTHMO Encodes a  
605 Nighttime Repressor of Circadian Gene Expression in the *Arabidopsis* Core Clock. *Current Biology*  
606 21: 126-133
- 607 Herrero E, Kolmos E, Bujdoso N, Yuan Y, Wang M, Berns MC, Uhlworm H, Coupland G, Saini R, Jaskolski  
608 M, Webb A, Gonçalves J, Davis SJ (2012) EARLY FLOWERING4 Recruitment of EARLY  
609 FLOWERING3 in the Nucleus Sustains the *Arabidopsis* Circadian Clock. *The Plant Cell Online*
- 610 Hicks KA, Albertson TM, Wagner DR (2001) EARLY FLOWERING3 Encodes a Novel Protein That Regulates  
611 Circadian Clock Function and Flowering in *Arabidopsis*. *Plant Cell* 13: 1281-1292
- 612 Huang H, Nusinow DA (2016) Into the Evening: Complex Interactions in the *Arabidopsis* Circadian Clock.  
613 *Trends in Genetics* 32: 674-686
- 614 Huang W, Perez-Garcia P, Pokhilko A, Millar AJ, Antoshechkin I, Riechmann JL, Mas P (2012) Mapping the  
615 Core of the *Arabidopsis* Circadian Clock Defines the Network Structure of the Oscillator. *Science*  
616 336: 75-79
- 617 Huq E, Tepperman JM, Quail PH (2000) GIGANTEA is a nuclear protein involved in phytochrome signaling  
618 in *Arabidopsis*. *Proc Natl Acad Sci U S A* 97: 9789-9794
- 619 Inoue K, Araki T, Endo M (2017) Integration of Input Signals into the Gene Network in the Plant Circadian  
620 Clock. *Plant and Cell Physiology* 58: 977-982
- 621 Kamioka M, Takao S, Suzuki T, Taki K, Higashiyama T, Kinoshita T, Nakamichi N (2016) Direct Repression  
622 of Evening Genes by CIRCADIANT CLOCK-ASSOCIATED1 in the *Arabidopsis* Circadian Clock. *The*  
623 *Plant Cell* 28: 696
- 624 Kim W-Y, Fujiwara S, Suh S-S, Kim J, Kim Y, Han L, David K, Putterill J, Nam HG, Somers DE (2007)  
625 ZEITLUPE is a circadian photoreceptor stabilized by GIGANTEA in blue light. *Nature* 449: 356-360
- 626 Kim WY, Hicks KA, Somers DE (2005) Independent roles for EARLY FLOWERING 3 and ZEITLUPE in the  
627 control of circadian timing, hypocotyl length, and flowering time. *Plant Physiol* 139: 1557-1569
- 628 Kim Y, Lim J, Yeom M, Kim H, Kim J, Wang L, Kim Woe Y, Somers David E, Nam Hong G (2013) ELF4  
629 Regulates GIGANTEA Chromatin Access through Subnuclear Sequestration. *Cell Reports* 3: 671-  
630 677
- 631 Kim Y, Yeom M, Kim H, Lim J, Koo HJ, Hwang D, Somers D, Nam HG (2012) GIGANTEA and EARLY  
632 FLOWERING 4 in *Arabidopsis* Exhibit Differential Phase-Specific Genetic Influences over a Diurnal  
633 Cycle. *Molecular Plant*
- 634 Kolmos E, Herrero E, Bujdoso N, Millar AJ, Toth R, Gyula P, Nagy F, Davis SJ (2011) A Reduced-Function  
635 Allele Reveals That EARLY FLOWERING3 Repressive Action on the Circadian Clock Is Modulated  
636 by Phytochrome Signals in *Arabidopsis*. *Plant Cell*
- 637 Kolmos E, Nowak M, Werner M, Fischer K, Schwarz G, Mathews S, Schoof H, Nagy F, Bujnicki JM, Davis SJ  
638 (2009) Integrating ELF4 into the circadian system through combined structural and functional  
639 studies. *HFSP J* 3: 350-366
- 640 Lincoln C, Britton JH, Estelle M (1990) Growth and development of the *axr1* mutants of *Arabidopsis*. *The*  
641 *Plant Cell* 2: 1071
- 642 Liu XL, Covington MF, Fankhauser C, Chory J, Wagner DR (2001) ELF3 Encodes a Circadian  
643 Clock-Regulated Nuclear Protein That Functions in an *Arabidopsis* PHYB Signal Transduction  
644 Pathway. *The Plant Cell Online* 13: 1293-1304
- 645 Locke JC, Kozma-Bognar L, Gould PD, Feher B, Kevei E, Nagy F, Turner MS, Hall A, Millar AJ (2006)  
646 Experimental validation of a predicted feedback loop in the multi-oscillator clock of *Arabidopsis*  
647 *thaliana*. *Mol Syst Biol* 2: 59

- 648 Lu SX, Webb CJ, Knowles SM, Kim SHJ, Wang Z, Tobin EM (2012) CCA1 and ELF3 Interact in the Control of  
649 Hypocotyl Length and Flowering Time in Arabidopsis. *Plant Physiol* 158: 1079-1088
- 650 Ma D, Li X, Guo Y, Chu J, Fang S, Yan C, Noel JP, Liu H (2015) Cryptochrome 1 interacts with PIF4 to  
651 regulate high temperature-mediated hypocotyl elongation in response to blue light. *Proceedings*  
652 *of the National Academy of Sciences*
- 653 Makino S, Matsushika A, Kojima M, Yamashino T, Mizuno T (2002) The APRR1/TOC1 Quintet Implicated  
654 in Circadian Rhythms of Arabidopsis thaliana: I. Characterization with APRR1-Overexpressing  
655 Plants. *Plant and Cell Physiology* 43: 58-69
- 656 Martin-Tryon EL, Krepis JA, Harmer SL (2007) GIGANTEA acts in blue light signaling and has biochemically  
657 separable roles in circadian clock and flowering time regulation. *Plant Physiol* 143: 473-486
- 658 McWatters HG, Bastow RM, Hall A, Millar AJ (2000) The ELF3zeitnehmer regulates light signalling to the  
659 circadian clock. *Nature* 408: 716-720
- 660 Mizoguchi T, Wright L, Fujiwara S, Cremer F, Lee K, Onouchi H, Mouradov A, Fowler S, Kamada H,  
661 Putterill J, Coupland G (2005) Distinct Roles of GIGANTEA in Promoting Flowering and Regulating  
662 Circadian Rhythms in Arabidopsis. *The Plant Cell Online* 17: 2255-2270
- 663 Mizuno T, Nomoto Y, Oka H, Kitayama M, Takeuchi A, Tsubouchi M, Yamashino T (2014) Ambient  
664 Temperature Signal Feeds into the Circadian Clock Transcriptional Circuitry Through the EC  
665 Night-Time Repressor in Arabidopsis thaliana. *Plant and Cell Physiology* 55: 958-976
- 666 Müller LM, von Korff M, Davis SJ (2014) Connections between circadian clocks and carbon metabolism  
667 reveal species-specific effects on growth control. *Journal of Experimental Botany* 65: 2915-2923
- 668 Nakamichi N, Kiba T, Henriques R, Mizuno T, Chua N-H, Sakakibara H (2010) PSEUDO-RESPONSE  
669 REGULATORS 9, 7, and 5 Are Transcriptional Repressors in the Arabidopsis Circadian Clock. *The*  
670 *Plant Cell Online* 22: 594-605
- 671 Nieto C, López-Salmerón V, Davière J-M, Prat S (2014) ELF3-PIF4 Interaction Regulates Plant Growth  
672 Independently of the Evening Complex. *Current Biology*
- 673 Niwa Y, Yamashino T, Mizuno T (2009) The Circadian Clock Regulates the Photoperiodic Response of  
674 Hypocotyl Elongation through a Coincidence Mechanism in Arabidopsis thaliana. *Plant and Cell*  
675 *Physiology* 50: 838-854
- 676 Nohales MA, Kay SA (2016) Molecular mechanisms at the core of the plant circadian oscillator. *Nat*  
677 *Struct Mol Biol* 23: 1061-1069
- 678 Nozue K, Covington MF, Duek PD, Lorrain S, Fankhauser C, Harmer SL, Maloof JN (2007) Rhythmic  
679 growth explained by coincidence between internal and external cues. *Nature* 448: 358-361
- 680 Nusinow DA, Helfer A, Hamilton EE, King JJ, Imaizumi T, Schultz TF, Farre EM, Kay SA (2011) The ELF4-  
681 ELF3-LUX complex links the circadian clock to diurnal control of hypocotyl growth. *Nature* 475:  
682 398-402
- 683 Oakenfull RJ, Davis SJ (2017) Shining a light on the Arabidopsis circadian clock. *Plant, Cell &*  
684 *Environment*: n/a-n/a
- 685 Panigrahi KCS, Mishra P (2015) GIGANTEA - An Emerging Story. *Frontiers in Plant Science* 6
- 686 Park Y-J, Lee H-J, Ha J-H, Kim JY, Park C-M (2017) COP1 conveys warm temperature information to  
687 hypocotyl thermomorphogenesis. *New Phytologist*: n/a-n/a
- 688 Pedmale Ullas V, Huang S-shan C, Zander M, Cole Benjamin J, Hetzel J, Ljung K, Reis Pedro AB, Sridevi P,  
689 Nito K, Nery Joseph R, Ecker Joseph R, Chory J (2015) Cryptochromes Interact Directly with PIFs  
690 to Control Plant Growth in Limiting Blue Light. *Cell*
- 691 Quint M, Delker C, Franklin KA, Wigge PA, Halliday KJ, Zanten M (2016) Molecular and genetic control of  
692 plant thermomorphogenesis. *Nat Plants* 2
- 693 Raschke A, Ibanez C, Ullrich K, Anwer M, Becker S, Glockner A, Trenner J, Denk K, Saal B, Sun X, Ni M,  
694 Davis S, Delker C, Quint M (2015) Natural variants of ELF3 affect thermomorphogenesis by  
695 transcriptionally modulating PIF4-dependent auxin response genes. *BMC Plant Biology* 15: 197

696 Reed JW, Nagpal P, Bastow RM, Solomon KS, Dowson-Day MJ, Elumalai RP, Millar AJ (2000) Independent  
697 action of ELF3 and phyB to control hypocotyl elongation and flowering time. *Plant Physiol* 122:  
698 1149-1160

699 Ronald J, Davis S (2017) Making the clock tick: the transcriptional landscape of the plant circadian clock  
700 Vol 6

701 Sawa M, Kay SA (2011) GIGANTEA directly activates Flowering Locus T in *Arabidopsis thaliana*.  
702 *Proceedings of the National Academy of Sciences*

703 Shin J, Anwer MU, Davis SJ (2013) Phytochrome-Interacting Factors (PIFs) as Bridges between  
704 Environmental Signals and the Circadian Clock: Diurnal Regulation of Growth and Development.  
705 *Molecular Plant* 6: 592-595

706 Soyk S, Muller NA, Park SJ, Schmalenbach I, Jiang K, Hayama R, Zhang L, Van Eck J, Jimenez-Gomez JM,  
707 Lippman ZB (2016) Variation in the flowering gene SELF PRUNING 5G promotes day-neutrality  
708 and early yield in tomato. *Nat Genet* advance online publication

709 Wang Z-Y, Tobin EM (1998) Constitutive Expression of the CIRCADIAN CLOCK ASSOCIATED 1 (CCA1) Gene  
710 Disrupts Circadian Rhythms and Suppresses Its Own Expression. *Cell* 93: 1207-1217

711 Yamashino T, Ito S, Niwa Y, Kunihiro A, Nakamichi N, Mizuno T (2008) Involvement of *Arabidopsis* Clock-  
712 Associated Pseudo-Response Regulators in Diurnal Oscillations of Gene Expression in the  
713 Presence of Environmental Time Cues. *Plant and Cell Physiology* 49: 1839-1850

714 Yeom M, Kim H, Lim J, Shin A-Y, Hong S, Kim J-I, Nam HG (2014) How Do Phytochromes Transmit the  
715 Light Quality Information to the Circadian Clock in *Arabidopsis*. *Molecular Plant* 7: 1701-1704

716 Yu JW, Rubio V, Lee NY, Bai S, Lee SY, Kim SS, Liu L, Zhang Y, Irigoyen ML, Sullivan JA, Lee I, Xie Q, Paek  
717 NC, Deng XW (2008) COP1 and ELF3 control circadian function and photoperiodic flowering by  
718 regulating GI stability. *Mol Cell* 32: 617-630

719 Zagotta MT, Hicks KA, Jacobs CI, Young JC, Hangarter RP, Meeks-Wagner DR (1996) The *Arabidopsis* ELF3  
720 gene regulates vegetative photomorphogenesis and the photoperiodic induction of flowering.  
721 *The Plant Journal: For Cell and Molecular Biology* 10: 691-702

722 Zeilinger MN, Farre EM, Taylor SR, Kay SA, Doyle FJ (2006) A novel computational model of the circadian  
723 clock in *Arabidopsis* that incorporates PRR7 and PRR9. *Mol Syst Biol* 2

724 Zhu J-Y, Oh E, Wang T, Wang Z-Y (2016) TOC1-PIF4 interaction mediates the circadian gating of  
725 thermoresponsive growth in *Arabidopsis*. *Nature Communications* 7: 13692

726

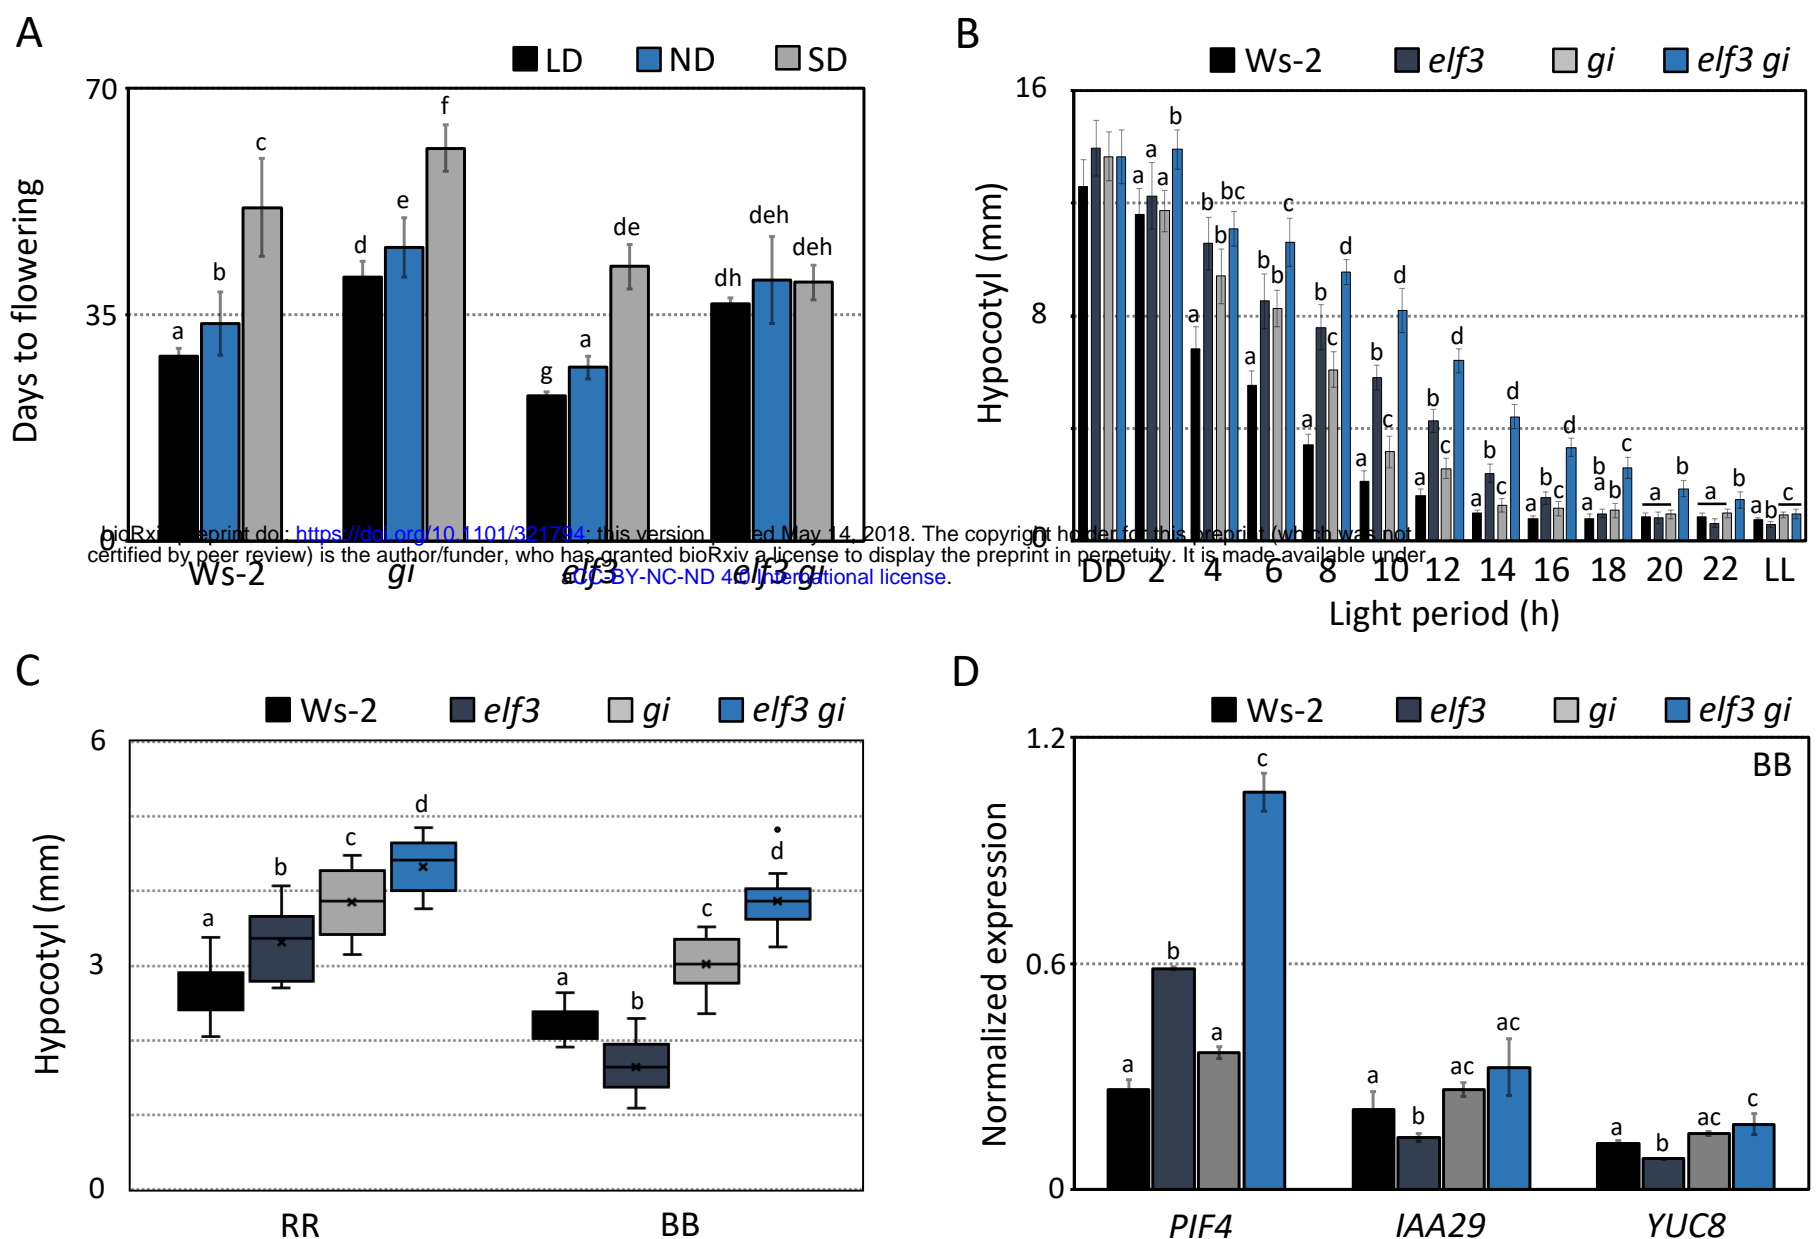

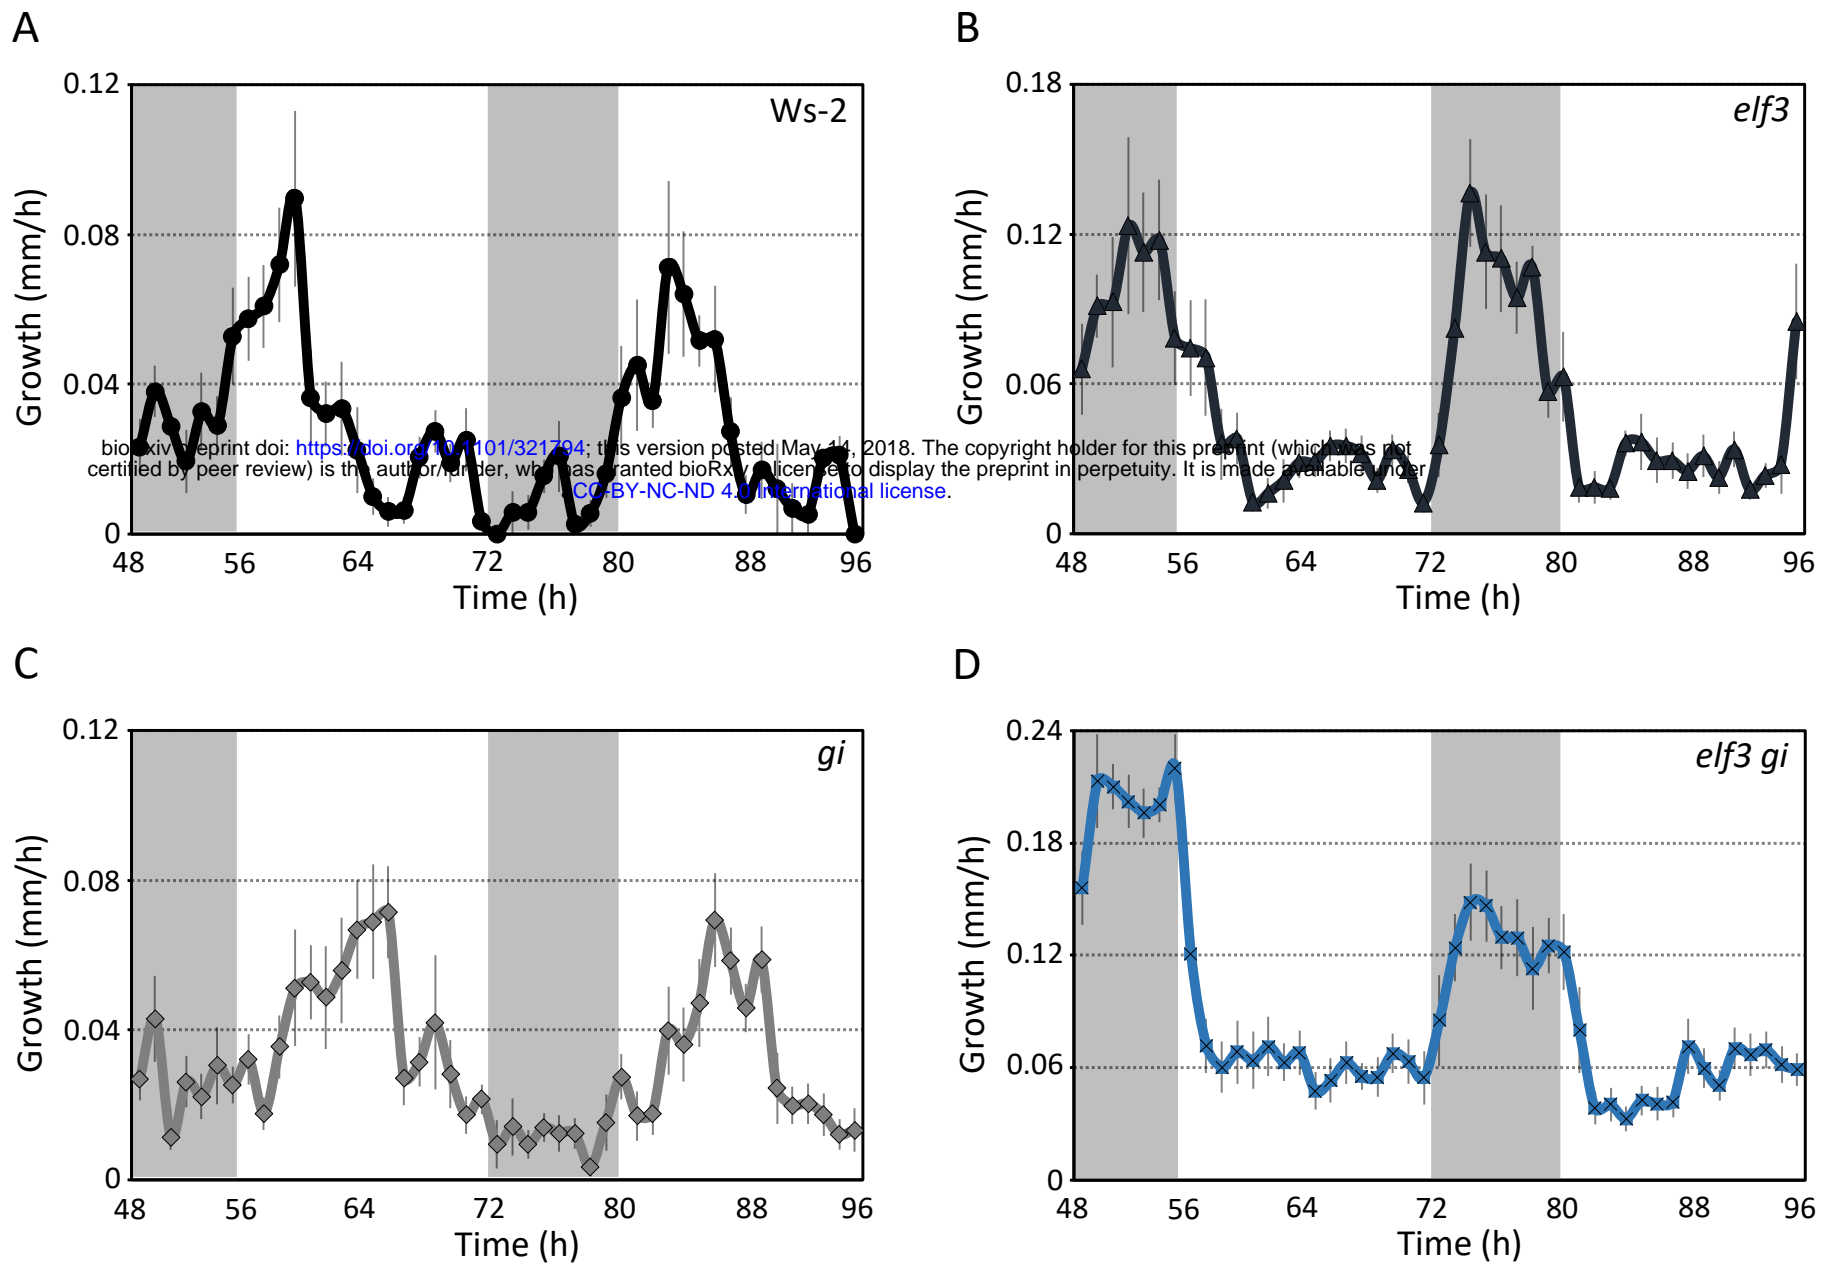

**Figure 2. *ELF3* and *GI* repress growth during night and day respectively.**

**(A-D)** Growth rate of *Ws-2*, *elf3*, *gi* and *elf3 gi* under LD. Starting from the third day photographs were taken every one hour using a modified Infra red camera. To measure new growth, the time-lapsed images were imported into ImageJ and hypocotyl length was measured (please see materials and methods for details). Non-shaded area in the graph represent light period (day), and shaded area represents dark period (night). Error bars represent standard error of the mean (S.E.M.),  $n \geq 8$ . Experiment was repeated at least three times with similar results.

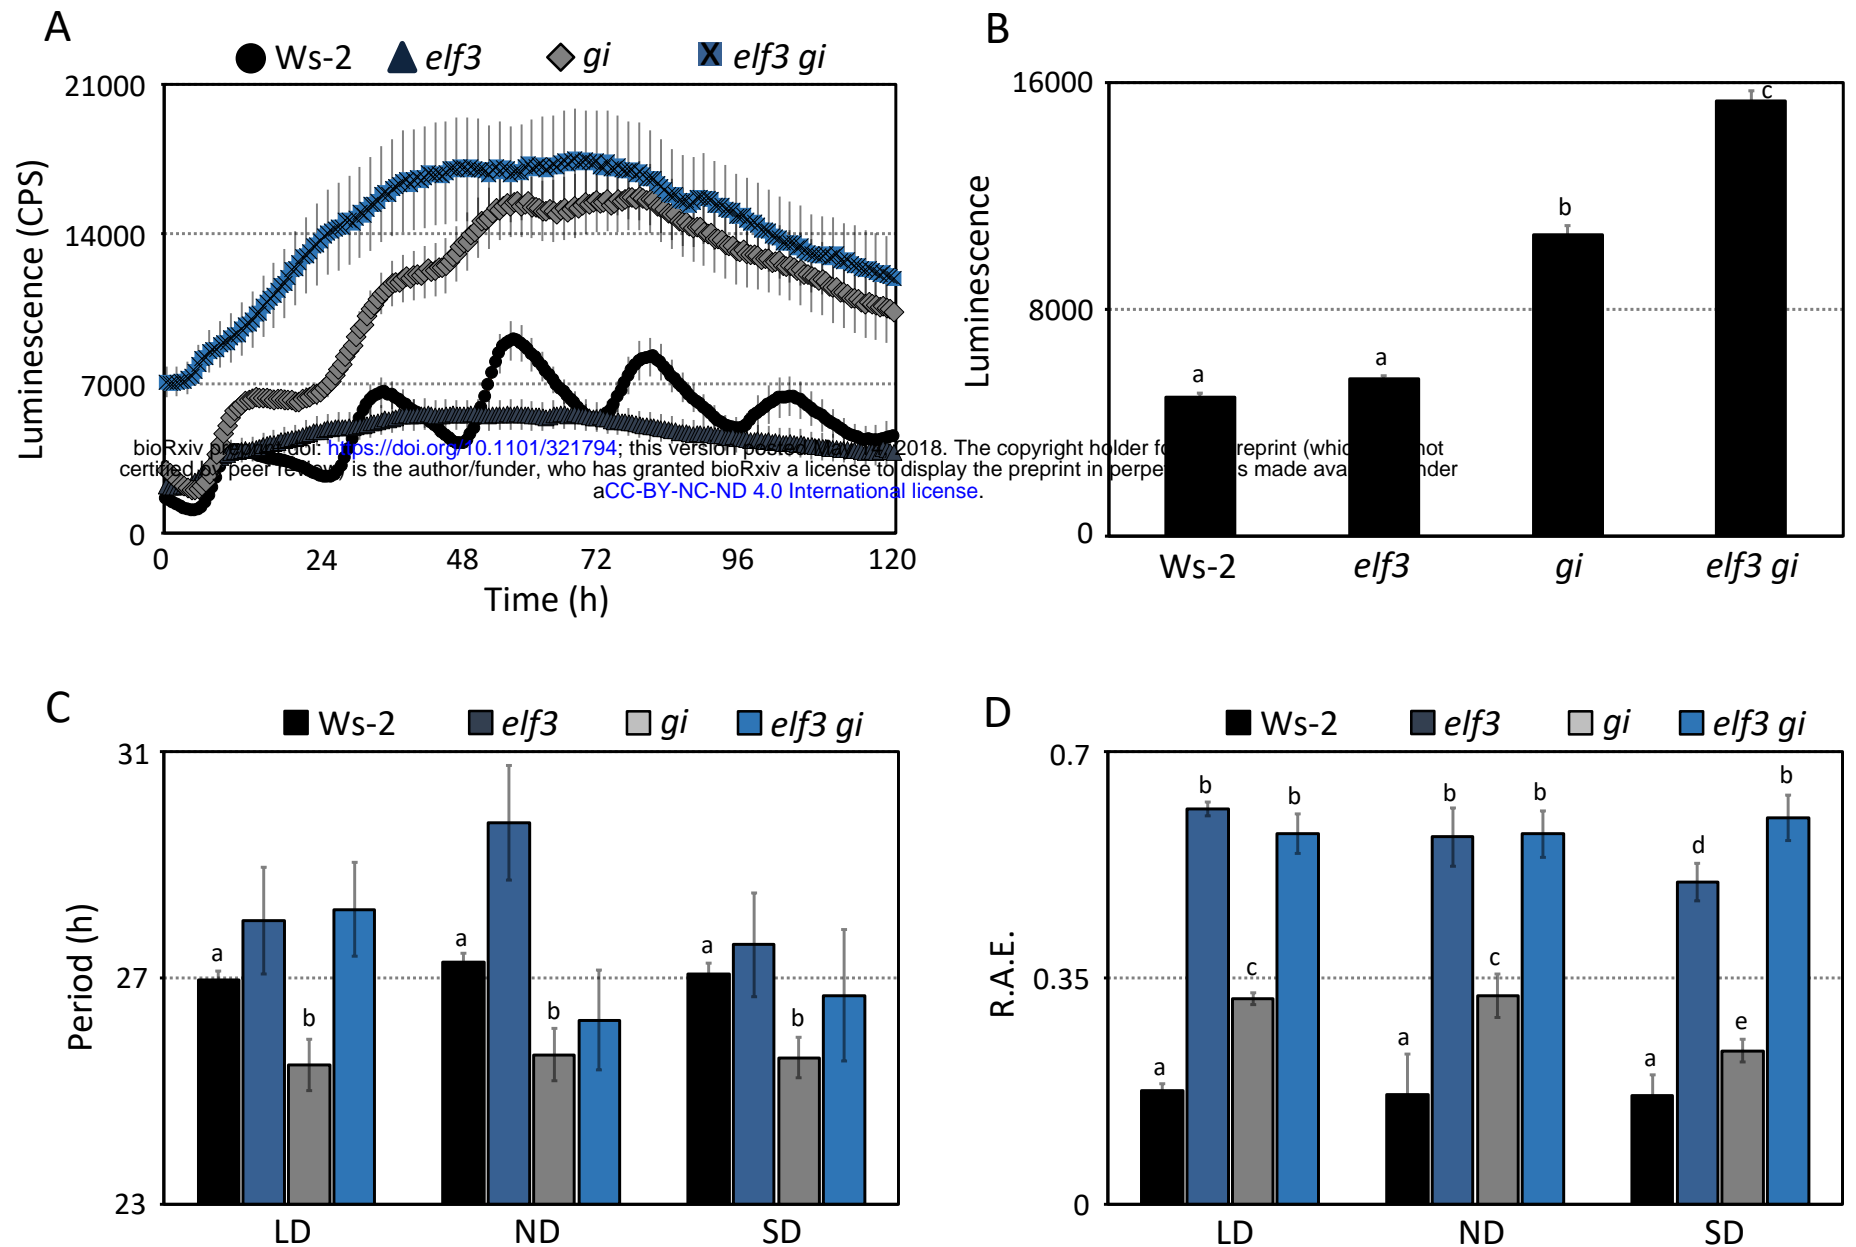

**Figure 3. *ELF3* and *GI* work independently in circadian clock.**

**(A)** Free-running profile of *CCR2::LUC* expression in *Ws-2*, *elf3*, *gi* and *elf3 gi*. The plants were entrained for 7 days under 12h:12h light dark cycles, followed by transfer to LL and measurement of *CCR2::LUC* expression for 5 days. Error bars represent SEM and are shown on every third reading. **(B)** absolute Luminescence values of the *CCR2::LUC* profiles shown in (A). Error bars are SEM, n=48. Significance as described in Figure 1. **(C)** Period and **(D)** R.A.E. estimates after entrainment under different photoperiods. Plants were entrained for 7 days under LD, ND or SD before releasing into the free-running condition of constant light and temperature. The *CCR2::LUC* profiles were monitored for 5 days under free-running and period and R.A.E. was calculated. Error bars are SEM, n=48. Significance as described in Figure 1. Because of the arrhythmic nature of the *elf3* and *elf3 gi*, these lines were excluded from statistical analysis in (C).

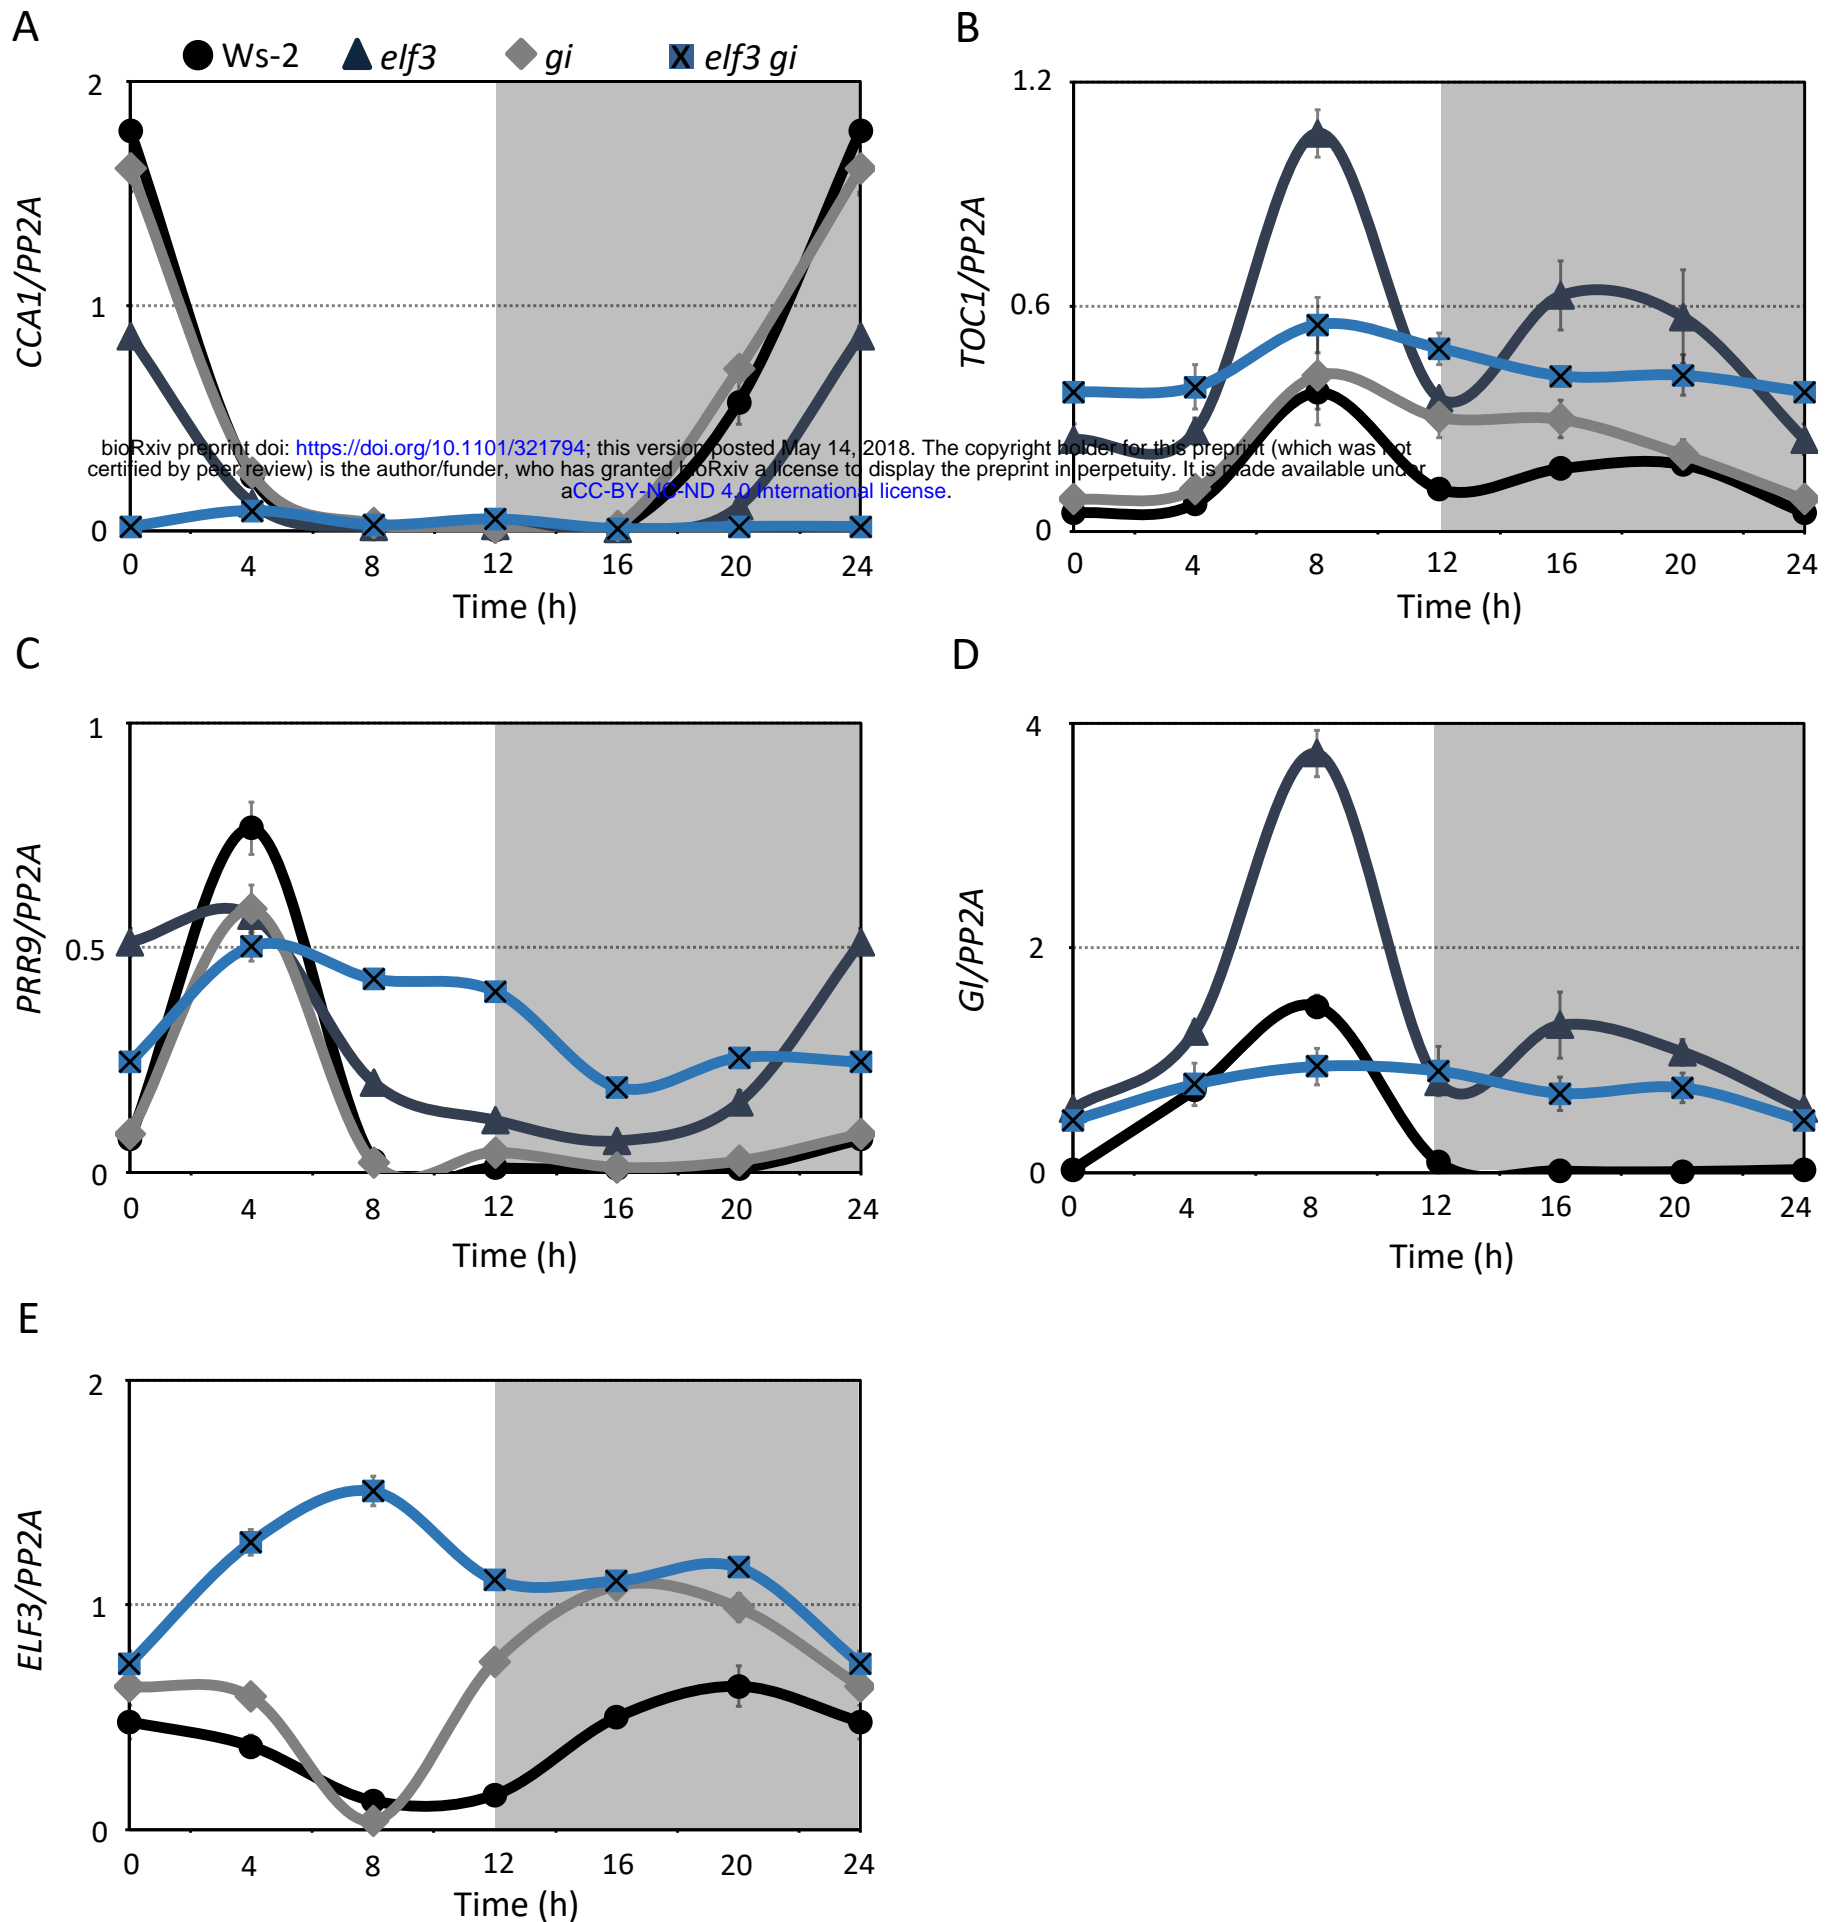

**Figure 4. *ELF3* and *GI* are required for clock entrainment.**

(A-E) Transcript accumulation of different circadian clock genes *CCA1* (A), *TOC1* (B), *PRR9* (C), *GI* (D) and *ELF3* (E) in *Ws-2*, *elf3*, *gi* and *elf3 gi* (*elf3 gi*) under ND (12h light: 12h darkness). Error bars represent the standard deviation of three technical repeats. Expression levels were normalized for *PROTEIN 19 PHOSPHATASE 2a subunit A3* (*PP2A*). Experiment was repeated with similar results. Open bars in the graph represent time in LL, and closed bar represents time in DD.



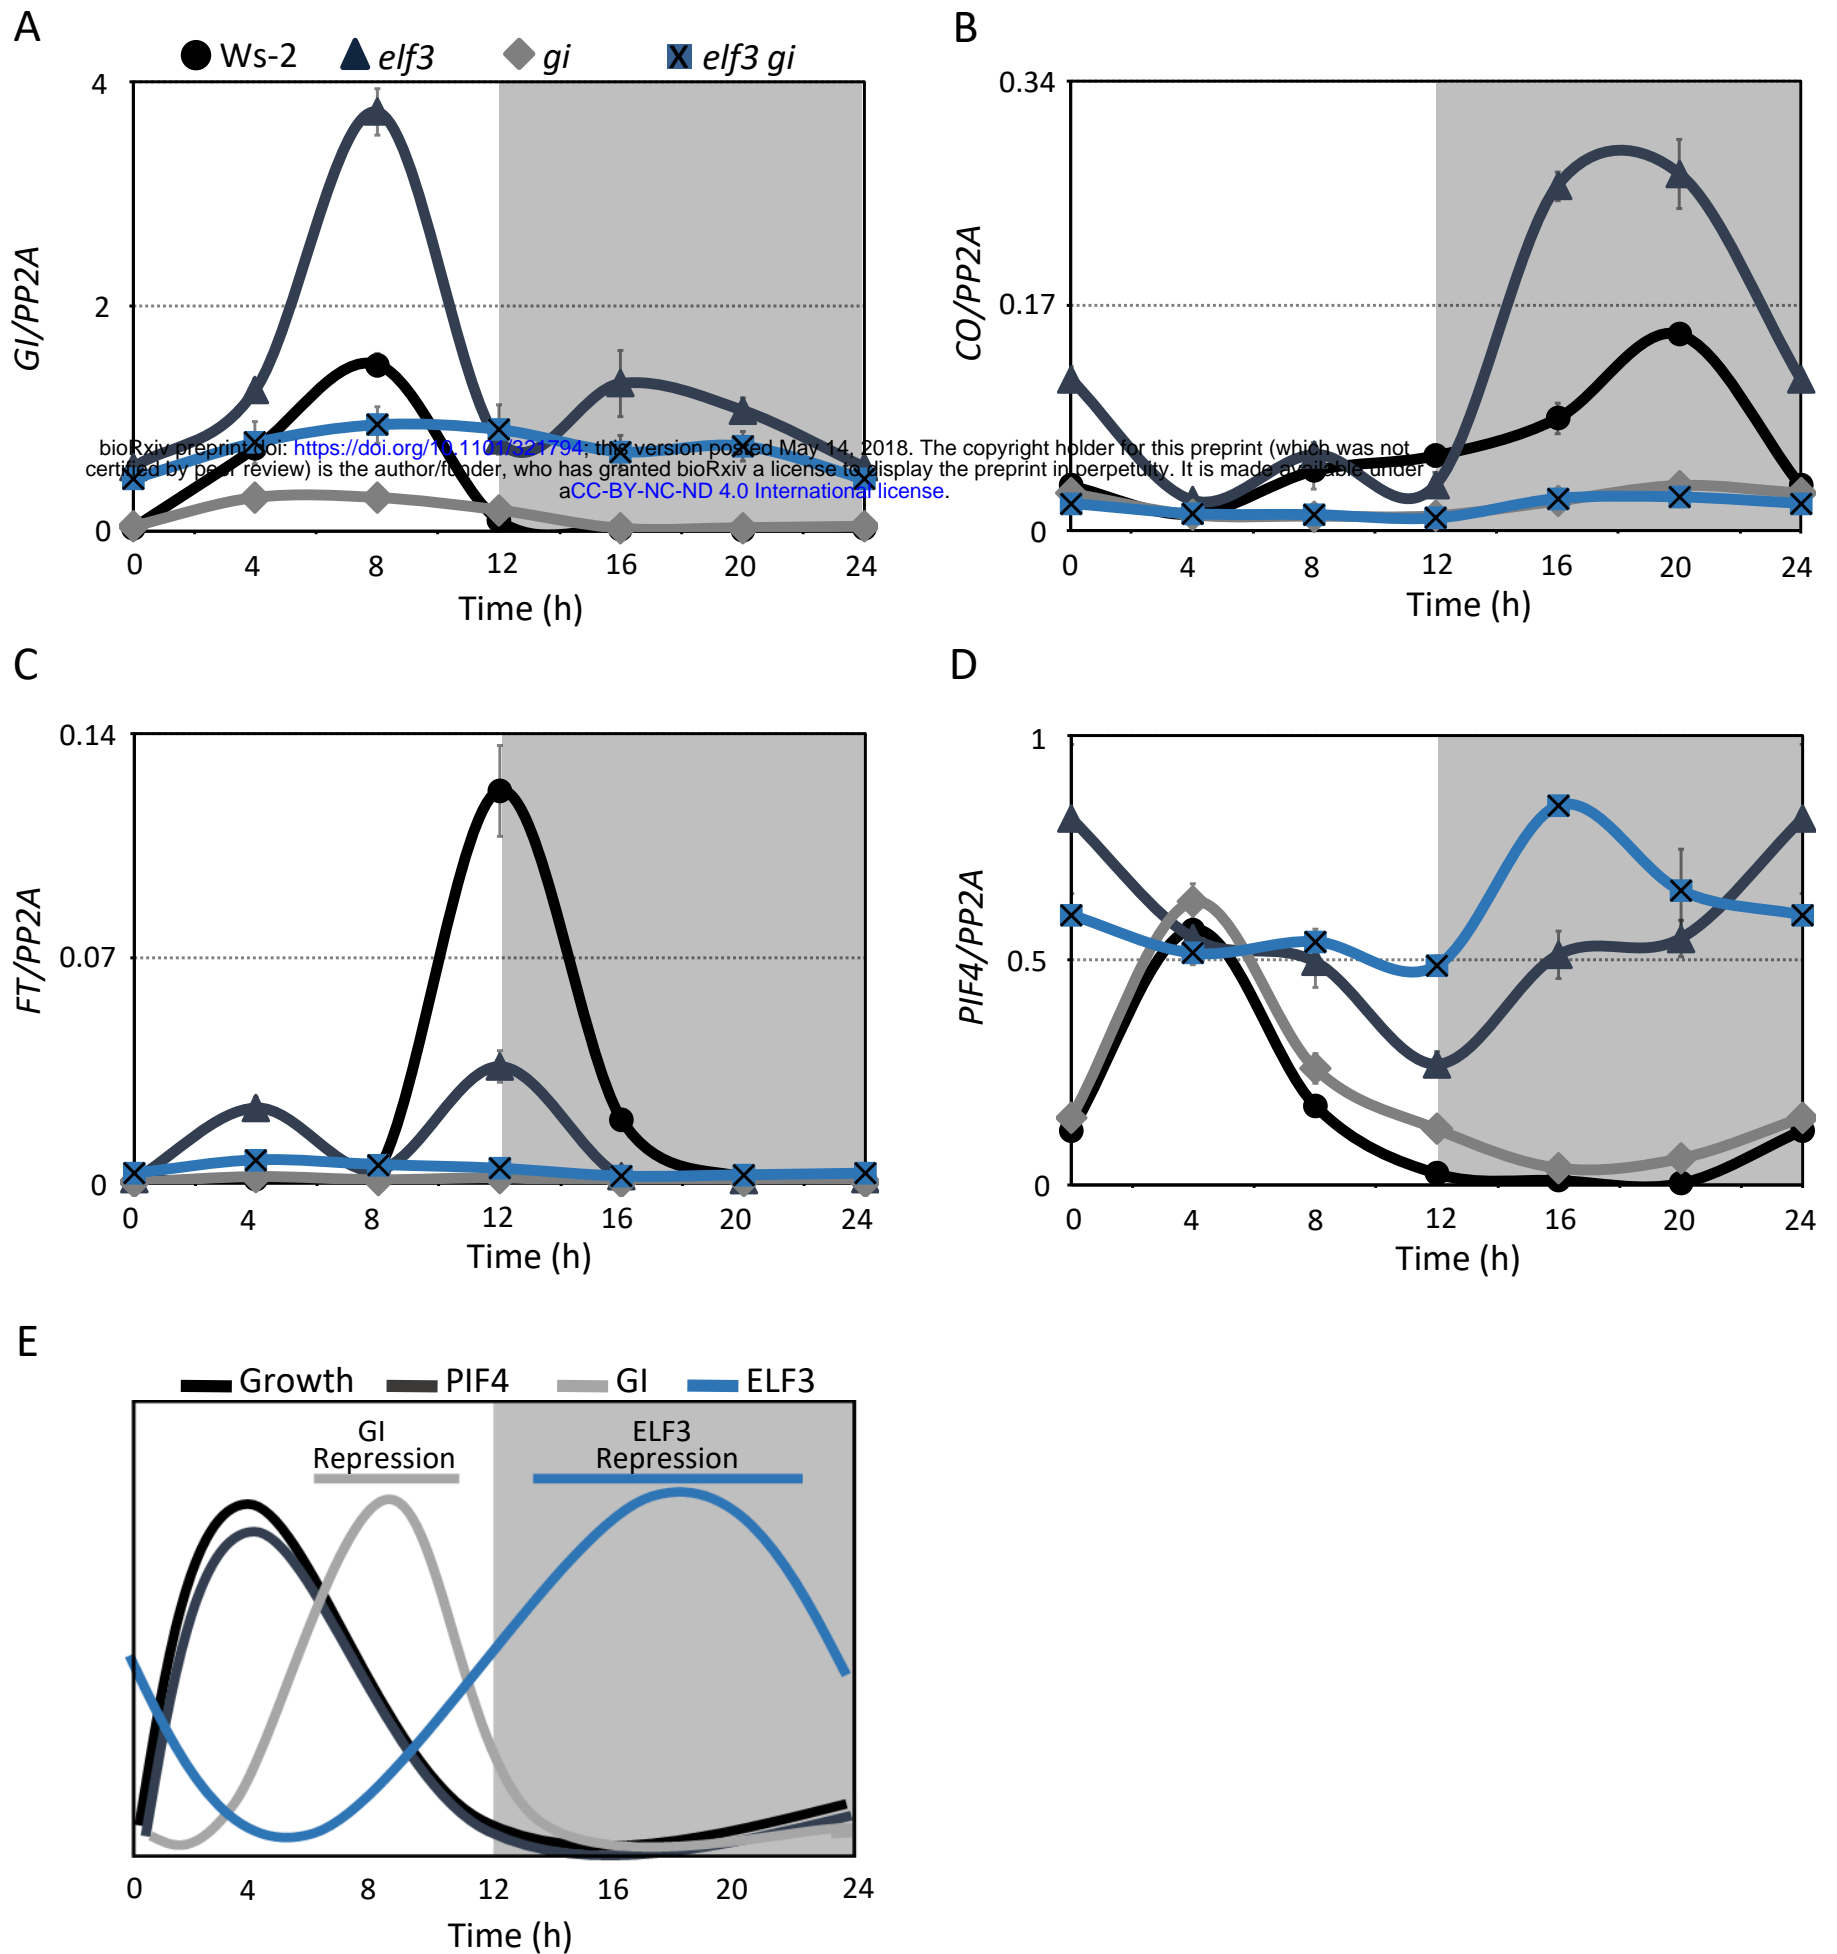

**Figure 5. Endogenous and environmental signals synchronization requires functional *ELF3* and *GI*.**

**(A-D)** Transcript accumulation of flowering time genes *GI* **(A)**, *CO* **(B)** and *FT* **(C)** and major growth promoter *PIF4* **(D)** in *Ws-2*, *elf3*, *gi* and *elf3 gi* (*elf3 gi*) under ND (12h light: 12h darkness). Error bars represent the standard deviation of three technical repeats. Expression levels were normalized for *PROTEIN 19 PHOSPHATASE 2a subunit A3* (*PP2A*). Experiment was repeated with similar results. Open bars in the graph represent time in LL, and closed bar represents time in DD. **(E)** A model of hypocotyl growth. *ELF3* and *GI* repress growth during the night and late-day, respectively by repressing the expression of *PIF4*.

## Parsed Citations

**Alabadi D, Oyama T, Yanovsky MJ, Harmon FG, Más P, Kay SA (2001) Reciprocal Regulation Between TOC1 and LHY/CCA1 Within the Arabidopsis Circadian Clock. Science 293: 880-883**

Pubmed: [Author and Title](#)  
CrossRef: [Author and Title](#)  
Google Scholar: [Author Only](#) [Title Only](#) [Author and Title](#)

**Andres F, Coupland G (2012) The genetic basis of flowering responses to seasonal cues. Nat Rev Genet 13: 627-639**

Pubmed: [Author and Title](#)  
CrossRef: [Author and Title](#)  
Google Scholar: [Author Only](#) [Title Only](#) [Author and Title](#)

**Anwer MU, Boikoglou E, Herrero E, Hallstein M, Davis AM, Velikkakam James G, Nagy F, Davis SJ, Mockler TC (2014) Natural variation reveals that intracellular distribution of ELF3 protein is associated with function in the circadian clock. eLife**

Pubmed: [Author and Title](#)  
CrossRef: [Author and Title](#)  
Google Scholar: [Author Only](#) [Title Only](#) [Author and Title](#)

**Anwer MU, Davis SJ (2013) An overview of natural variation studies in the Arabidopsis thaliana circadian clock. Seminars in Cell & Developmental Biology 24: 422-429**

Pubmed: [Author and Title](#)  
CrossRef: [Author and Title](#)  
Google Scholar: [Author Only](#) [Title Only](#) [Author and Title](#)

**Bendix C, Marshall Carine M, Harmon Frank G (2015) Circadian Clock Genes Universally Control Key Agricultural Traits. Molecular Plant 8: 1135-1152**

Pubmed: [Author and Title](#)  
CrossRef: [Author and Title](#)  
Google Scholar: [Author Only](#) [Title Only](#) [Author and Title](#)

**Box Mathew S, Huang BE, Domijan M, Jaeger Katja E, Khattak Asif K, Yoo Seong J, Sedivy Emma L, Jones DM, Hearn Timothy J, Webb Alex AR, Grant A, Locke James CW, Wigge Philip A (2014) ELF3 Controls Thermoresponsive Growth in Arabidopsis. Current Biology**

Pubmed: [Author and Title](#)  
CrossRef: [Author and Title](#)  
Google Scholar: [Author Only](#) [Title Only](#) [Author and Title](#)

**Chou M-L, Yang C-H (1999) Late-Flowering Genes Interact with Early-Flowering Genes to Regulate Flowering Time in Arabidopsis thaliana. Plant and Cell Physiology 40: 702-708**

Pubmed: [Author and Title](#)  
CrossRef: [Author and Title](#)  
Google Scholar: [Author Only](#) [Title Only](#) [Author and Title](#)

**David KM, Armbruster U, Tama N, Putterill J (2006) Arabidopsis GIGANTEA protein is post-transcriptionally regulated by light and dark. FEBS Lett 580: 1193-1197**

Pubmed: [Author and Title](#)  
CrossRef: [Author and Title](#)  
Google Scholar: [Author Only](#) [Title Only](#) [Author and Title](#)

**de Montaigu A, Coupland G (2017) The timing of GIGANTEA expression during day/night cycles varies with the geographical origin of Arabidopsis accessions. Plant Signaling & Behavior: 00-00**

Pubmed: [Author and Title](#)  
CrossRef: [Author and Title](#)  
Google Scholar: [Author Only](#) [Title Only](#) [Author and Title](#)

**de Montaigu A, Giakountis A, Rubin M, Tóth R, Cremer F, Sokolova V, Porri A, Reymond M, Weinig C, Coupland G (2014) Natural diversity in daily rhythms of gene expression contributes to phenotypic variation. Proceedings of the National Academy of Sciences**

Pubmed: [Author and Title](#)  
CrossRef: [Author and Title](#)  
Google Scholar: [Author Only](#) [Title Only](#) [Author and Title](#)

**de Montaigu A, Toth R, Coupland G (2010) Plant development goes like clockwork. Trends Genet 26: 296-306**

Pubmed: [Author and Title](#)  
CrossRef: [Author and Title](#)  
Google Scholar: [Author Only](#) [Title Only](#) [Author and Title](#)

**Doyle MR, Davis SJ, Bastow RM, McWatters HG, Kozma-Bognar L, Nagy F, Millar AJ, Amasino RM (2002) The ELF4 gene controls circadian rhythms and flowering time in Arabidopsis thaliana. Nature 419: 74-77**

Pubmed: [Author and Title](#)  
CrossRef: [Author and Title](#)  
Google Scholar: [Author Only](#) [Title Only](#) [Author and Title](#)

**Ezer D, Jung J-H, Lan H, Biswas S, Gregoire L, Box MS, Charoensawan V, Cortijo S, Lai X, Stöckle D, Zubieta C, Jaeger KE, Wigge PA (2017) The evening complex coordinates environmental and endogenous signals in Arabidopsis. 3: 17087**

Pubmed: [Author and Title](#)  
CrossRef: [Author and Title](#)  
Google Scholar: [Author Only Title Only Author and Title](#)

**Faure S, Turner AS, Gruszka D, Christodoulou V, Davis SJ, von Korff M, Laurie DA (2012) Mutation at the circadian clock gene EARLY MATURITY 8 adapts domesticated barley (*Hordeum vulgare*) to short growing seasons. Proceedings of the National Academy of Sciences**

Pubmed: [Author and Title](#)  
CrossRef: [Author and Title](#)  
Google Scholar: [Author Only Title Only Author and Title](#)

**Fornara F, de Montaigu A, Sánchez-Villarreal A, Takahashi Y, Ver Loren van Themaat E, Huettel B, Davis SJ, Coupland G (2015) The GI-CDF module of *Arabidopsis* affects freezing tolerance and growth as well as flowering. The Plant Journal 81: 695-706**

Pubmed: [Author and Title](#)  
CrossRef: [Author and Title](#)  
Google Scholar: [Author Only Title Only Author and Title](#)

**Fornara F, Panigrahi KCS, Gissot L, Sauerbrunn N, Rühl M, Jarillo JA, Coupland G (2009) *Arabidopsis* DOF Transcription Factors Act Redundantly to Reduce CONSTANS Expression and Are Essential for a Photoperiodic Flowering Response. Developmental Cell 17: 75-86**

Pubmed: [Author and Title](#)  
CrossRef: [Author and Title](#)  
Google Scholar: [Author Only Title Only Author and Title](#)

**Fowler S, Lee K, Onouchi H, Samach A, Richardson K, Morris B, Coupland G, Putterill J (1999) GIGANTEA: a circadian clock-controlled gene that regulates photoperiodic flowering in *Arabidopsis* and encodes a protein with several possible membrane-spanning domains. EMBO J 18: 4679-4688**

Pubmed: [Author and Title](#)  
CrossRef: [Author and Title](#)  
Google Scholar: [Author Only Title Only Author and Title](#)

**Hall A, Bastow RM, Davis SJ, Hanano S, McWatters HG, Hibberd V, Doyle MR, Sung S, Halliday KJ, Amasino RM, Millar AJ (2003) The TIME FOR COFFEE Gene Maintains the Amplitude and Timing of *Arabidopsis* Circadian Clocks. The Plant Cell Online 15: 2719-2729**

Pubmed: [Author and Title](#)  
CrossRef: [Author and Title](#)  
Google Scholar: [Author Only Title Only Author and Title](#)

**Hanano S, Stracke R, Jakoby M, Merkle T, Domagalska MA, Weisshaar B, Davis SJ (2008) A systematic survey in *Arabidopsis thaliana* of transcription factors that modulate circadian parameters. BMC Genomics 9: 182-182**

Pubmed: [Author and Title](#)  
CrossRef: [Author and Title](#)  
Google Scholar: [Author Only Title Only Author and Title](#)

**Helfer A, Nusinow DA, Chow BY, Gehrke AR, Bulyk ML, Kay SA (2011) LUX ARRHYTHMO Encodes a Nighttime Repressor of Circadian Gene Expression in the *Arabidopsis* Core Clock. Current Biology 21: 126-133**

Pubmed: [Author and Title](#)  
CrossRef: [Author and Title](#)  
Google Scholar: [Author Only Title Only Author and Title](#)

**Herrero E, Kolmos E, Bujdoso N, Yuan Y, Wang M, Berns MC, Uhlworm H, Coupland G, Saini R, Jaskolski M, Webb A, Gonçalves J, Davis SJ (2012) EARLY FLOWERING4 Recruitment of EARLY FLOWERING3 in the Nucleus Sustains the *Arabidopsis* Circadian Clock. The Plant Cell Online**

Pubmed: [Author and Title](#)  
CrossRef: [Author and Title](#)  
Google Scholar: [Author Only Title Only Author and Title](#)

**Hicks KA, Albertson TM, Wagner DR (2001) EARLY FLOWERING3 Encodes a Novel Protein That Regulates Circadian Clock Function and Flowering in *Arabidopsis*. Plant Cell 13: 1281-1292**

Pubmed: [Author and Title](#)  
CrossRef: [Author and Title](#)  
Google Scholar: [Author Only Title Only Author and Title](#)

**Huang H, Nusinow DA (2016) Into the Evening: Complex Interactions in the *Arabidopsis* Circadian Clock. Trends in Genetics 32: 674-686**

Pubmed: [Author and Title](#)  
CrossRef: [Author and Title](#)  
Google Scholar: [Author Only Title Only Author and Title](#)

**Huang W, Perez-Garcia P, Pokhilko A, Millar AJ, Antoshechkin I, Riechmann JL, Mas P (2012) Mapping the Core of the *Arabidopsis* Circadian Clock Defines the Network Structure of the Oscillator. Science 336: 75-79**

Pubmed: [Author and Title](#)  
CrossRef: [Author and Title](#)  
Google Scholar: [Author Only Title Only Author and Title](#)

**Huq E, Tepperman JM, Quail PH (2000) GIGANTEA is a nuclear protein involved in phytochrome signaling in *Arabidopsis*. Proc Natl**

**Acad Sci U S A 97: 9789-9794**

Pubmed: [Author and Title](#)  
CrossRef: [Author and Title](#)  
Google Scholar: [Author Only Title Only Author and Title](#)

**Inoue K, Araki T, Endo M (2017) Integration of Input Signals into the Gene Network in the Plant Circadian Clock. Plant and Cell Physiology 58: 977-982**

Pubmed: [Author and Title](#)  
CrossRef: [Author and Title](#)  
Google Scholar: [Author Only Title Only Author and Title](#)

**Kamioka M, Takao S, Suzuki T, Taki K, Higashiyama T, Kinoshita T, Nakamichi N (2016) Direct Repression of Evening Genes by CIRCADIAN CLOCK-ASSOCIATED1 in the Arabidopsis Circadian Clock. The Plant Cell 28: 696**

Pubmed: [Author and Title](#)  
CrossRef: [Author and Title](#)  
Google Scholar: [Author Only Title Only Author and Title](#)

**Kim W-Y, Fujiwara S, Suh S-S, Kim J, Kim Y, Han L, David K, Putterill J, Nam HG, Somers DE (2007) ZEITLUPE is a circadian photoreceptor stabilized by GIGANTEA in blue light. Nature 449: 356-360**

Pubmed: [Author and Title](#)  
CrossRef: [Author and Title](#)  
Google Scholar: [Author Only Title Only Author and Title](#)

**Kim WY, Hicks KA, Somers DE (2005) Independent roles for EARLY FLOWERING 3 and ZEITLUPE in the control of circadian timing, hypocotyl length, and flowering time. Plant Physiol 139: 1557-1569**

Pubmed: [Author and Title](#)  
CrossRef: [Author and Title](#)  
Google Scholar: [Author Only Title Only Author and Title](#)

**Kim Y, Lim J, Yeom M, Kim H, Kim J, Wang L, Kim Woe Y, Somers David E, Nam Hong G (2013) ELF4 Regulates GIGANTEA Chromatin Access through Subnuclear Sequestration. Cell Reports 3: 671-677**

Pubmed: [Author and Title](#)  
CrossRef: [Author and Title](#)  
Google Scholar: [Author Only Title Only Author and Title](#)

**Kim Y, Yeom M, Kim H, Lim J, Koo HJ, Hwang D, Somers D, Nam HG (2012) GIGANTEA and EARLY FLOWERING 4 in Arabidopsis Exhibit Differential Phase-Specific Genetic Influences over a Diurnal Cycle. Molecular Plant**

Pubmed: [Author and Title](#)  
CrossRef: [Author and Title](#)  
Google Scholar: [Author Only Title Only Author and Title](#)

**Kolmos E, Herrero E, Bujdoso N, Millar AJ, Toth R, Gyula P, Nagy F, Davis SJ (2011) A Reduced-Function Allele Reveals That EARLY FLOWERING3 Repressive Action on the Circadian Clock Is Modulated by Phytochrome Signals in Arabidopsis. Plant Cell**

Pubmed: [Author and Title](#)  
CrossRef: [Author and Title](#)  
Google Scholar: [Author Only Title Only Author and Title](#)

**Kolmos E, Nowak M, Werner M, Fischer K, Schwarz G, Mathews S, Schoof H, Nagy F, Bujnicki JM, Davis SJ (2009) Integrating ELF4 into the circadian system through combined structural and functional studies. HFSP J 3: 350-366**

Pubmed: [Author and Title](#)  
CrossRef: [Author and Title](#)  
Google Scholar: [Author Only Title Only Author and Title](#)

**Lincoln C, Britton JH, Estelle M (1990) Growth and development of the axr1 mutants of Arabidopsis. The Plant Cell 2: 1071**

Pubmed: [Author and Title](#)  
CrossRef: [Author and Title](#)  
Google Scholar: [Author Only Title Only Author and Title](#)

**Liu XL, Covington MF, Fankhauser C, Chory J, Wagner DR (2001) ELF3 Encodes a Circadian Clock-Regulated Nuclear Protein That Functions in an Arabidopsis PHYB Signal Transduction Pathway. The Plant Cell Online 13: 1293-1304**

Pubmed: [Author and Title](#)  
CrossRef: [Author and Title](#)  
Google Scholar: [Author Only Title Only Author and Title](#)

**Locke JC, Kozma-Bognar L, Gould PD, Feher B, Kevei E, Nagy F, Turner MS, Hall A, Millar AJ (2006) Experimental validation of a predicted feedback loop in the multi-oscillator clock of Arabidopsis thaliana. Mol Syst Biol 2: 59**

Pubmed: [Author and Title](#)  
CrossRef: [Author and Title](#)  
Google Scholar: [Author Only Title Only Author and Title](#)

**Lu SX, Webb CJ, Knowles SM, Kim SHJ, Wang Z, Tobin EM (2012) CCA1 and ELF3 Interact in the Control of Hypocotyl Length and Flowering Time in Arabidopsis. Plant Physiol 158: 1079-1088**

Pubmed: [Author and Title](#)  
CrossRef: [Author and Title](#)  
Google Scholar: [Author Only Title Only Author and Title](#)

**Ma D, Li X, Guo Y, Chu J, Fang S, Yan C, Noel JP, Liu H (2015) Cryptochrome 1 interacts with PIF4 to regulate high temperature-mediated hypocotyl elongation in response to blue light. Proceedings of the National Academy of Sciences**

Pubmed: [Author and Title](#)  
CrossRef: [Author and Title](#)  
Google Scholar: [Author Only Title Only Author and Title](#)

**Makino S, Matsushika A, Kojima M, Yamashino T, Mizuno T (2002) The APRR1/TOC1 Quintet Implicated in Circadian Rhythms of Arabidopsis thaliana: I. Characterization with APRR1-Overexpressing Plants. Plant and Cell Physiology 43: 58-69**

Pubmed: [Author and Title](#)  
CrossRef: [Author and Title](#)  
Google Scholar: [Author Only Title Only Author and Title](#)

**Martin-Tryon EL, Kreps JA, Harmer SL (2007) GIGANTEA acts in blue light signaling and has biochemically separable roles in circadian clock and flowering time regulation. Plant Physiol 143: 473-486**

Pubmed: [Author and Title](#)  
CrossRef: [Author and Title](#)  
Google Scholar: [Author Only Title Only Author and Title](#)

**McWatters HG, Bastow RM, Hall A, Millar AJ (2000) The ELF3zeitnehmer regulates light signalling to the circadian clock. Nature 408: 716-720**

Pubmed: [Author and Title](#)  
CrossRef: [Author and Title](#)  
Google Scholar: [Author Only Title Only Author and Title](#)

**Mizoguchi T, Wright L, Fujiwara S, Cremer F, Lee K, Onouchi H, Mouradov A, Fowler S, Kamada H, Putterill J, Coupland G (2005) Distinct Roles of GIGANTEA in Promoting Flowering and Regulating Circadian Rhythms in Arabidopsis. The Plant Cell Online 17: 2255-2270**

Pubmed: [Author and Title](#)  
CrossRef: [Author and Title](#)  
Google Scholar: [Author Only Title Only Author and Title](#)

**Mizuno T, Nomoto Y, Oka H, Kitayama M, Takeuchi A, Tsubouchi M, Yamashino T (2014) Ambient Temperature Signal Feeds into the Circadian Clock Transcriptional Circuitry Through the EC Night-Time Repressor in Arabidopsis thaliana. Plant and Cell Physiology 55: 958-976**

Pubmed: [Author and Title](#)  
CrossRef: [Author and Title](#)  
Google Scholar: [Author Only Title Only Author and Title](#)

**Müller LM, von Korff M, Davis SJ (2014) Connections between circadian clocks and carbon metabolism reveal species-specific effects on growth control. Journal of Experimental Botany 65: 2915-2923**

Pubmed: [Author and Title](#)  
CrossRef: [Author and Title](#)  
Google Scholar: [Author Only Title Only Author and Title](#)

**Nakamichi N, Kiba T, Henriques R, Mizuno T, Chua N-H, Sakakibara H (2010) PSEUDO-RESPONSE REGULATORS 9, 7, and 5 Are Transcriptional Repressors in the Arabidopsis Circadian Clock. The Plant Cell Online 22: 594-605**

Pubmed: [Author and Title](#)  
CrossRef: [Author and Title](#)  
Google Scholar: [Author Only Title Only Author and Title](#)

**Nieto C, López-Salmerón V, Davière J-M, Prat S (2014) ELF3-PIF4 Interaction Regulates Plant Growth Independently of the Evening Complex. Current Biology**

Pubmed: [Author and Title](#)  
CrossRef: [Author and Title](#)  
Google Scholar: [Author Only Title Only Author and Title](#)

**Niwa Y, Yamashino T, Mizuno T (2009) The Circadian Clock Regulates the Photoperiodic Response of Hypocotyl Elongation through a Coincidence Mechanism in Arabidopsis thaliana. Plant and Cell Physiology 50: 838-854**

Pubmed: [Author and Title](#)  
CrossRef: [Author and Title](#)  
Google Scholar: [Author Only Title Only Author and Title](#)

**Nohales MA, Kay SA (2016) Molecular mechanisms at the core of the plant circadian oscillator. Nat Struct Mol Biol 23: 1061-1069**

Pubmed: [Author and Title](#)  
CrossRef: [Author and Title](#)  
Google Scholar: [Author Only Title Only Author and Title](#)

**Nozue K, Covington MF, Duek PD, Lorrain S, Fankhauser C, Harmer SL, Maloof JN (2007) Rhythmic growth explained by coincidence between internal and external cues. Nature 448: 358-361**

Pubmed: [Author and Title](#)  
CrossRef: [Author and Title](#)  
Google Scholar: [Author Only Title Only Author and Title](#)

**Nusinow DA, Helfer A, Hamilton EE, King JJ, Imaizumi T, Schultz TF, Farre EM, Kay SA (2011) The ELF4-ELF3-LUX complex links the circadian clock to diurnal control of hypocotyl growth. Nature 475: 398-402**

Pubmed: [Author and Title](#)  
CrossRef: [Author and Title](#)  
Google Scholar: [Author Only Title Only Author and Title](#)

**Oakenfull RJ, Davis SJ (2017) Shining a light on the Arabidopsis circadian clock. Plant, Cell & Environment: n/a-n/a**

Pubmed: [Author and Title](#)  
CrossRef: [Author and Title](#)  
Google Scholar: [Author Only Title Only Author and Title](#)

**Panigrahi KCS, Mishra P (2015) GIGANTEA - An Emerging Story. Frontiers in Plant Science 6**

Pubmed: [Author and Title](#)  
CrossRef: [Author and Title](#)  
Google Scholar: [Author Only Title Only Author and Title](#)

**Park Y-J, Lee H-J, Ha J-H, Kim JY, Park C-M (2017) COP1 conveys warm temperature information to hypocotyl thermomorphogenesis. New Phytologist: n/a-n/a**

Pubmed: [Author and Title](#)  
CrossRef: [Author and Title](#)  
Google Scholar: [Author Only Title Only Author and Title](#)

**Pedmale Ullas V, Huang S-shan C, Zander M, Cole Benjamin J, Hetzel J, Ljung K, Reis Pedro AB, Sridevi P, Nito K, Nery Joseph R, Ecker Joseph R, Chory J (2015) Cryptochromes Interact Directly with PIFs to Control Plant Growth in Limiting Blue Light. Cell**

Pubmed: [Author and Title](#)  
CrossRef: [Author and Title](#)  
Google Scholar: [Author Only Title Only Author and Title](#)

**Quint M, Delker C, Franklin KA, Wigge PA, Halliday KJ, Zanten M (2016) Molecular and genetic control of plant thermomorphogenesis. Nat Plants 2**

Pubmed: [Author and Title](#)  
CrossRef: [Author and Title](#)  
Google Scholar: [Author Only Title Only Author and Title](#)

**Raschke A, Ibanez C, Ullrich K, Anwer M, Becker S, Glockner A, Trenner J, Denk K, Saal B, Sun X, Ni M, Davis S, Delker C, Quint M (2015) Natural variants of ELF3 affect thermomorphogenesis by transcriptionally modulating PIF4-dependent auxin response genes. BMC Plant Biology 15: 197**

Pubmed: [Author and Title](#)  
CrossRef: [Author and Title](#)  
Google Scholar: [Author Only Title Only Author and Title](#)

**Reed JW, Nagpal P, Bastow RM, Solomon KS, Dowson-Day MJ, Elumalai RP, Millar AJ (2000) Independent action of ELF3 and phyB to control hypocotyl elongation and flowering time. Plant Physiol 122: 1149-1160**

Pubmed: [Author and Title](#)  
CrossRef: [Author and Title](#)  
Google Scholar: [Author Only Title Only Author and Title](#)

**Ronald J, Davis S (2017) Making the clock tick: the transcriptional landscape of the plant circadian clock Vol 6**

**Sawa M, Kay SA (2011) GIGANTEA directly activates Flowering Locus T in Arabidopsis thaliana. Proceedings of the National Academy of Sciences**

Pubmed: [Author and Title](#)  
CrossRef: [Author and Title](#)  
Google Scholar: [Author Only Title Only Author and Title](#)

**Shin J, Anwer MU, Davis SJ (2013) Phytochrome-Interacting Factors (PIFs) as Bridges between Environmental Signals and the Circadian Clock: Diurnal Regulation of Growth and Development. Molecular Plant 6: 592-595**

Pubmed: [Author and Title](#)  
CrossRef: [Author and Title](#)  
Google Scholar: [Author Only Title Only Author and Title](#)

**Soyk S, Muller NA, Park SJ, Schmalenbach I, Jiang K, Hayama R, Zhang L, Van Eck J, Jimenez-Gomez JM, Lippman ZB (2016) Variation in the flowering gene SELF PRUNING 5G promotes day-neutrality and early yield in tomato. Nat Genet advance online publication**

Pubmed: [Author and Title](#)  
CrossRef: [Author and Title](#)  
Google Scholar: [Author Only Title Only Author and Title](#)

**Wang Z-Y, Tobin EM (1998) Constitutive Expression of the CIRCADIAN CLOCK ASSOCIATED 1 (CCA1) Gene Disrupts Circadian Rhythms and Suppresses Its Own Expression. Cell 93: 1207-1217**

Pubmed: [Author and Title](#)  
CrossRef: [Author and Title](#)  
Google Scholar: [Author Only Title Only Author and Title](#)

**Yamashino T, Ito S, Niwa Y, Kunihiro A, Nakamichi N, Mizuno T (2008) Involvement of Arabidopsis Clock-Associated Pseudo-Response Regulators in Diurnal Oscillations of Gene Expression in the Presence of Environmental Time Cues. Plant and Cell Physiology 49: 1839-1850**

Pubmed: [Author and Title](#)  
CrossRef: [Author and Title](#)

Google Scholar: [Author Only](#) [Title Only](#) [Author and Title](#)

**Yeom M, Kim H, Lim J, Shin A-Y, Hong S, Kim J-I, Nam HG (2014) How Do Phytochromes Transmit the Light Quality Information to the Circadian Clock in Arabidopsis. Molecular Plant 7: 1701-1704**

Pubmed: [Author and Title](#)

CrossRef: [Author and Title](#)

Google Scholar: [Author Only](#) [Title Only](#) [Author and Title](#)

**Yu JW, Rubio V, Lee NY, Bai S, Lee SY, Kim SS, Liu L, Zhang Y, Irigoyen ML, Sullivan JA, Lee I, Xie Q, Paek NC, Deng XW (2008) COP1 and ELF3 control circadian function and photoperiodic flowering by regulating GI stability. Mol Cell 32: 617-630**

Pubmed: [Author and Title](#)

CrossRef: [Author and Title](#)

Google Scholar: [Author Only](#) [Title Only](#) [Author and Title](#)

**Zagotta MT, Hicks KA, Jacobs CI, Young JC, Hangarter RP, Meeks-Wagner DR (1996) The Arabidopsis ELF3 gene regulates vegetative photomorphogenesis and the photoperiodic induction of flowering. The Plant Journal: For Cell and Molecular Biology 10: 691-702**

Pubmed: [Author and Title](#)

CrossRef: [Author and Title](#)

Google Scholar: [Author Only](#) [Title Only](#) [Author and Title](#)

**Zeilinger MN, Farre EM, Taylor SR, Kay SA, Doyle FJ (2006) A novel computational model of the circadian clock in Arabidopsis that incorporates PRR7 and PRR9. Mol Syst Biol 2**

Pubmed: [Author and Title](#)

CrossRef: [Author and Title](#)

Google Scholar: [Author Only](#) [Title Only](#) [Author and Title](#)

**Zhu J-Y, Oh E, Wang T, Wang Z-Y (2016) TOC1-PIF4 interaction mediates the circadian gating of thermoresponsive growth in Arabidopsis. Nature Communications 7: 13692**

Pubmed: [Author and Title](#)

CrossRef: [Author and Title](#)

Google Scholar: [Author Only](#) [Title Only](#) [Author and Title](#)
